# Supplementary material for: Nucleobase pairing and photodimerization in a biologically derived metal-organic framework nanoreactor
Source: PubMed Central journal article supplement (PMC6453978; doi:10.1038/s41467-019-09486-2), 2019-04-08
Supplement: 41467_2019_9486_MOESM1_ESM.pdf [file 41467_2019_9486_MOESM1_ESM.pdf]

1  
2  
3  
4  
5  
6  
7  
8  
9  
10  
11  
12  
13  
14  
15  
16  
17  
18  
19  
20  
21  
22  
23  
24  
25  
26

**Nucleobase Pairing and Photodimerization in a Biologically Derived Metal-Organic  
Framework Nanoreactor**

*Anderson et al.*

## 56 **Supplementary Discussion 1. Experimental: Materials and Characterization Methods**

57 Reagents and solvents were purchased from Sigma-Aldrich, TCI, and Carl Roth and used without further  
58 purification. Infrared spectra were collected on a Perkin Elmer FT-IR/FIR Frontier Spectrometer from 400 to  
59 4000  $\text{cm}^{-1}$ . Thermogravimetric analysis (TGA) was performed under air atmosphere on a TA instrument SDT  
60 Q600. A dried crystalline sample was heated at a rate of 5  $^{\circ}\text{C}/\text{min}$  until 650  $^{\circ}\text{C}$  and then cooled to room  
61 temperature at a rate of 10 $^{\circ}\text{C}/\text{min}$ . Powder X-ray diffraction data were collected on a Bruker D8 Advanced  
62 using Cu  $\text{K}\alpha$  radiation ( $\lambda = 1.5418 \text{ \AA}$ , 50 kW/40mA). Single crystal X-ray diffraction data were collected at  
63 the ESRF in Grenoble, France. Simulated powder X-ray diffraction patterns were generated from the single  
64 crystal data using Mercury 3.0. MAS  $^1\text{H}$ - $^{13}\text{C}$  NMR spectra were collected on a 400 MHz Bruker NMR, while  
65 *insitu*  $^1\text{H}$  NMR spectra were collected on a 400 MHz Bruker NMR. Elemental analyses (EA) were obtained  
66 using a Thermo EA1112 Flash CHNS-O Analyzer. High resolution X-ray photoemission spectra (XPS) on  
67 neutral adenine (Ade), commercial available  $\text{Me}_2\text{NH}_2\text{Cl}^+$  and **SION-19'** were recorded on a Scienta ESCA 300  
68 spectrometer located at Daresbury Laboratory, UK, which incorporated a rotating anode Al  $\text{K}\alpha$  ( $h\nu =$   
69 1486.6 eV) X-ray source and has an effective instrument resolution of 400 meV. The spectrometer was  
70 calibrated regularly to set the Fermi edge of a silver reference sample at zero binding energy. Samples were  
71 mounted on adhesive tape and, to reduce charging, the samples were covered with a stainless steel mask,  
72 through which a small area of the sample was exposed. In addition, it was necessary to use an electron  
73 flood gun to stabilize the surface charge. Use of a flood gun shifts all spectral features to high kinetic  
74 energy, and photoelectron spectra were therefore charge calibrated using a weak C1s contaminant peak  
75 (present due to surface hydrocarbon contamination from vacuum pumps and other sources) which was  
76 assigned a binding energy of 285.0 eV. The integrity of the samples under the measurement conditions of  
77 high vacuum and x-ray irradiation was determined by collecting several sequential N1s region spectra. No  
78 changes over time were seen in any sample, suggesting that no significant sample degradation occurred  
79 during the measurements. Spectra were fitted using CasaXPS software. All fitted peak shapes were 70:30  
80 Gaussian:Lorentzian convolutions, and linear backgrounds were used in all cases. Gas sorption  
81 measurements: Carbon Dioxide, Nitrogen and Methane isotherms were collected on activated **SION-19'**  
82 using the Intelligent Gravimetric Analyser Instrument (IGA) from Hiden Isochema.  $\text{CO}_2$  isotherms were  
83 collected at 195 K, 273 K and 298 K at 1 bar, while  $\text{N}_2$  isotherms were collected at 77 K and 1 bar.  $\text{CH}_4$   
84 isotherms were measured at 273 K and 298 K at 1 bar. For optical measurements, UV/vis was collected in  
85 solid state at room temperature on a Perkin Elmer Lambda 650S UV/vis spectrometer equipped with  
86 Labsphere integrating over the spectral range 190–900 nm using  $\text{BaSO}_4$  reflectance standards. The spectra  
87 for **SION-19** and **SION-19'** were collected using the solid-state holder containing with the same amount of  
88 solid; the holder for **SION-19'** was filled in the dry box. Fluorescence excitation and emission spectra and  
89 lifetimes were collected at room temperature on a Perkin-Elmer LS 55 fluorescence spectrometer.  
90 Excitation and emission spectra of **SION-19** and **SION-19'** (sealed in a capillary to prevent any re-absorption  
91 of  $\text{H}_2\text{O}$  moisture from the atmosphere from **SION-19'**) were collected in the range between 200-600 nm

92 and 400-700 nm respectively with scan speed of 10 nm/min. UHPLC was carried out using a Acquity UPLC  
93 HSS T3, 1.8  $\mu$ m, 2.1 x 100 mm column from Waters, on a ThermoScientific Orbitrap Q Exactive HF equipped  
94 with H-ESI and AP-MADLI source.

95

96

97

98

99

100

101

102

103

104

105

106

107

108

109

110

111

112

113

114

115

116

117

118 **Supplementary Discussion 2. Single-Crystal X-ray Diffraction and Topology.**

119 A high-quality single crystal of **SION-19** was isolated from the mother liquor, and mounted onto the  
120 PILATUS@SNBL diffractometer at the beamline BM01 of the European Synchrotron Radiation Facility,  
121 Grenoble, France. The crystal was probed with X-rays ( $\lambda = 0.7519 \text{ \AA}$ ), intensities of Bragg reflections were  
122 recorded with the PILATUS2M detector, and the crystal was kept at 100(2) K during the data collection.  
123 Raw data were processed with CrysAlisPro (2015) program suite,<sup>1</sup> and the empirical absorption correction  
124 was performed using spherical harmonics, implemented in SCALE3 ABSPACK scaling algorithm.

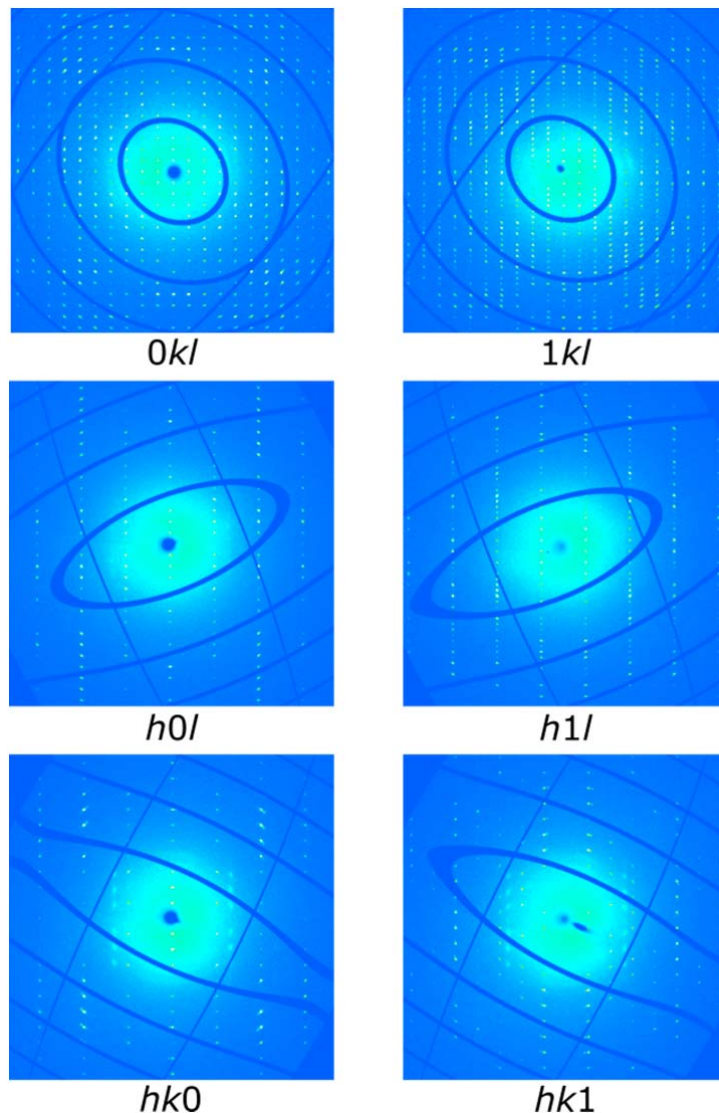

125

126 **Supplementary Figure 1:** Precession photographs reconstructed from the **SION-19** diffraction data.  
127 Orthorhombic metric symmetry is confirmed. Systematic absences for integer  $n$ :  $0kl$ :  $k = 2n, l = 2n$ ;  $h0l$ :  $h =$   
128  $2n, l = 2n$ ;  $hk0$ :  $h = 2n, k = 2n$ ;  $hkl$ :  $h + k = 2n$ . Extinction symbol  $Ccc(ab)$  corresponds uniquely to the space  
129 group  $Ccce$ .

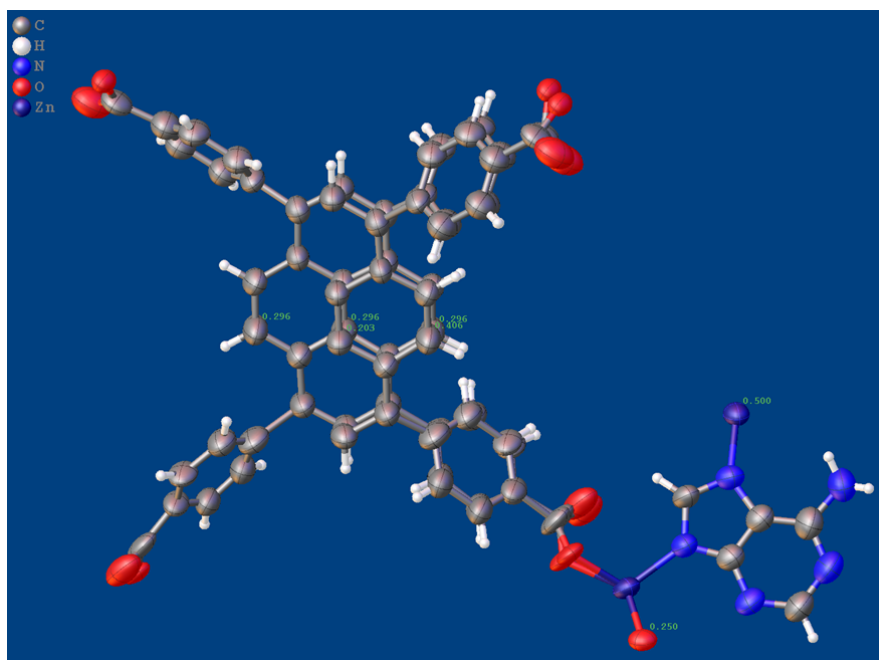

130

131 **Supplementary Figure 2:** Asymmetric unit of **SION-19**. Crystallographic occupancy is shown next to  
 132 selected atoms. In the TBAPy<sup>4-</sup> ligand the occupancies are identical within the same parts of disorder. Four  
 133 C atoms of the half TBAPy<sup>4-</sup> with 0.406-occupancy that form the long diagonal of the pyrene core lie exactly  
 134 on the crystallographic 2-fold axis, which reduces their occupancy by a factor of 2.

135

136 Crystal structure of **SION-19** was solved with the SUPERFLIP structure solution program using Charge  
 137 Flipping and refined with the ShelXL refinement package using least-squares minimization,<sup>2,5</sup> implemented  
 138 in the Olex2 program suite.<sup>6</sup> The solution confirmed the *Cc*ce space-group symmetry, observed equally in  
 139 the reciprocal space reconstruction images (Supplementary Figure 1). Atomic positions were found from  
 140 the electron density maxima and refined anisotropically for all non-H atoms. In the asymmetric unit (ASU)  
 141 the following structural units were localized: two Zn(II) atoms, with one on them lying on a special position  
 142 with 0.5-occupancy, one deprotonated Ade<sup>-</sup> molecule, one O<sup>2-</sup> ion lying on a special position with 0.25-  
 143 occupancy, and half the TBAPy<sup>4-</sup> ligand. In the crystal structure of **SION-19** the TBAPy<sup>4-</sup> ligand is disordered  
 144 over three positions (with refined occupancies of 0.296, 0.406, and 0.296), with two of them being  
 145 symmetrically related by a crystallographic 2-fold axis. Therefore the aforementioned half TBAPy<sup>4-</sup> is  
 146 represented in the ASU with three sets of chemically equivalent atoms, as presented in Supplementary  
 147 Figure 2. Assuming that the formula unit comprises the content of the ASU ( $Z = 8$ ,  $Z' = 0.5$ ), the formula of  
 148 **SION-19** is Zn<sub>1.5</sub>(TBAPy)<sub>0.5</sub>(Ade)O<sub>0.25</sub>. Contribution of the disordered solvent molecules found in the  
 149 structural voids of **SION-19** to the measured structure factors was quantified with the solvent masking  
 150 procedure implemented in the Olex2 software.<sup>6, 7</sup> The unit cell was found to contain the total volume of  
 151 4393.6 Å<sup>3</sup> of structural voids carrying the electron count of 1217.8 e<sup>-</sup>. Structural details and final  
 152 refinement indicators are listed in Supplementary Table 1.

153 H-atom positions were derived from the molecular geometry (AFIX 43 for the aromatic H in TBAPy and Ade,  
 154 AFIX 93 for the –NH<sub>2</sub> group of Ade), and refined using the riding model. No significant difference electron  
 155 density was found in proximity of –NH<sub>2</sub> group prior to the H-atom assignment, undermining a potential  
 156 refinement based on electron density maxima.

**Supplementary Table 1:** Crystal data and structure refinement for **SION-19** - CCDC 1855564.

|                                             |                                                                                        |
|---------------------------------------------|----------------------------------------------------------------------------------------|
| Identification code                         | SION-19                                                                                |
| Empirical formula                           | C <sub>29.8</sub> H <sub>31</sub> N <sub>6.6</sub> O <sub>8.75</sub> Zn <sub>1.5</sub> |
| Formula weight                              | 719.67                                                                                 |
| Temperature/K                               | 100.0                                                                                  |
| Crystal system                              | orthorhombic                                                                           |
| Space group                                 | Ccce                                                                                   |
| a/Å                                         | 10.7402(3)                                                                             |
| b/Å                                         | 30.6236(7)                                                                             |
| c/Å                                         | 42.6282(11)                                                                            |
| α/°                                         | 90                                                                                     |
| β/°                                         | 90                                                                                     |
| γ/°                                         | 90                                                                                     |
| Volume/Å <sup>3</sup>                       | 14020.6(6)                                                                             |
| Z                                           | 16                                                                                     |
| ρ <sub>calc</sub> /cm <sup>3</sup>          | 1.364                                                                                  |
| μ/mm <sup>-1</sup>                          | 1.263                                                                                  |
| F(000)                                      | 5936.0                                                                                 |
| Crystal size/mm <sup>3</sup>                | 0.09 × 0.09 × 0.03                                                                     |
| Radiation                                   | synchrotron (λ = 0.7519)                                                               |
| 2θ range for data collection/°              | 3.464 to 56.06                                                                         |
| Index ranges                                | -11 ≤ h ≤ 11, -38 ≤ k ≤ 38, -53 ≤ l ≤ 53                                               |
| Reflections collected                       | 30744                                                                                  |
| Independent reflections                     | 6454 [R <sub>int</sub> = 0.0376, R <sub>sigma</sub> = 0.0295]                          |
| Data/restraints/parameters                  | 6454/554/425                                                                           |
| Goodness-of-fit on F <sup>2</sup>           | 1.136                                                                                  |
| Final R indexes [I >= 2σ (I)]               | R <sub>1</sub> = 0.1039, wR <sub>2</sub> = 0.2779                                      |
| Final R indexes [all data]                  | R <sub>1</sub> = 0.1165, wR <sub>2</sub> = 0.2885                                      |
| Largest diff. peak/hole / e Å <sup>-3</sup> | 0.91/-0.59                                                                             |

157

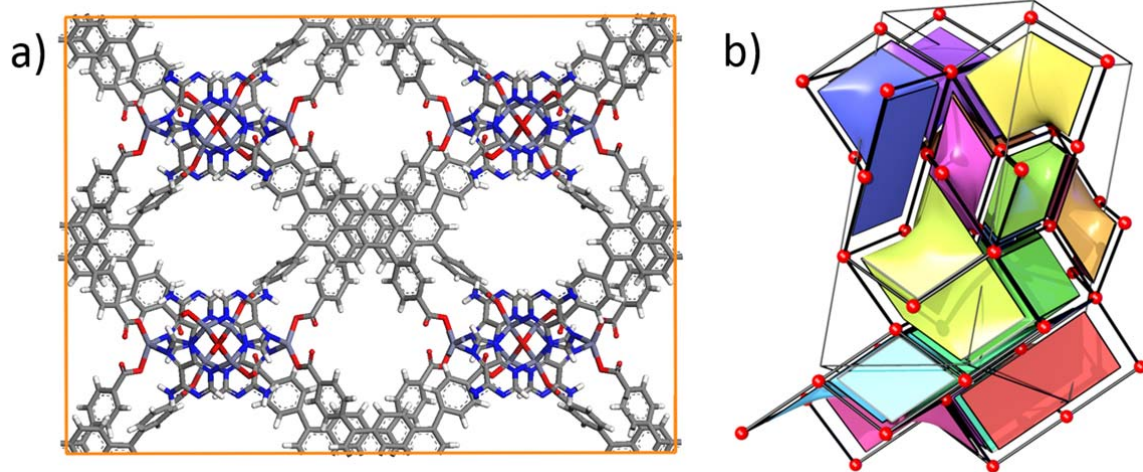

158

159 **Supplementary Figure 3:** Reducing the **SION-19** structure a) to the underlying 'kcs1' net, b) TOPOS 4.0 was  
160 used with the cluster simplification method to obtain the net in b).<sup>8</sup>

161

162

163

164

165

166

167

168

169

170

171

172

173

174

175

176

177

178 **Supplementary Discussion 3. Scanning Electron Microscopy (SEM).**

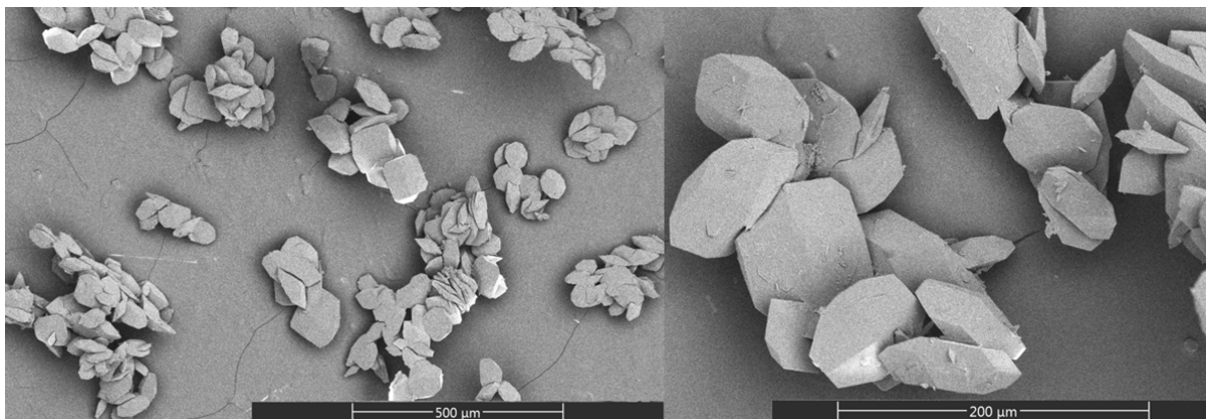

179

180 **Supplementary Figure 4:** SEM of **SION-19** crystals showing homogeneity, shape (truncated rhombic  
181 bipyramid like crystals), and size. Image on the left is at 500 μm, while the right is at 200 μm.

182

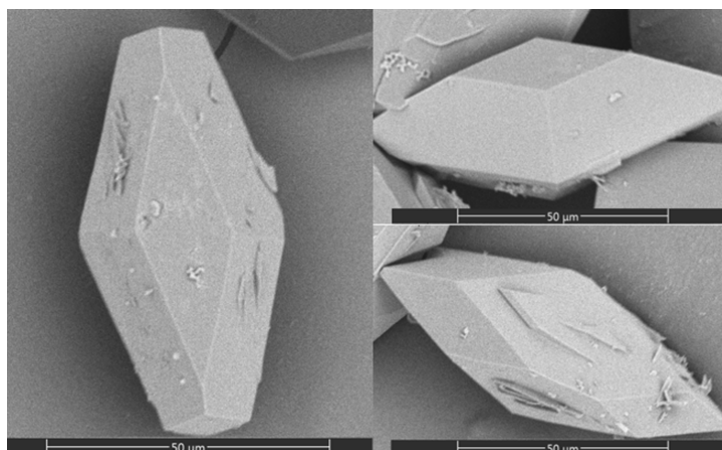

183

184 **Supplementary Figure 5:** SEM of **SION-19** crystals showing the truncated rhombic bipyramid like  
185 morphology. All images taken at 50 μm.

186

187

188

189

190

191

192

193

194



195 **Supplementary Discussion 4. Solid State Characterization.**

196 **Supplementary Discussion 4.1. Characterization of SION-19.**

197 The phase purity of **SION-19** was confirmed by the comparison of the experimental PXRD pattern with the  
198 simulated generated from the single crystal structure. **SION-19** was found to be air stable over a period of 6  
199 months at ambient temperature while stored in a vial.

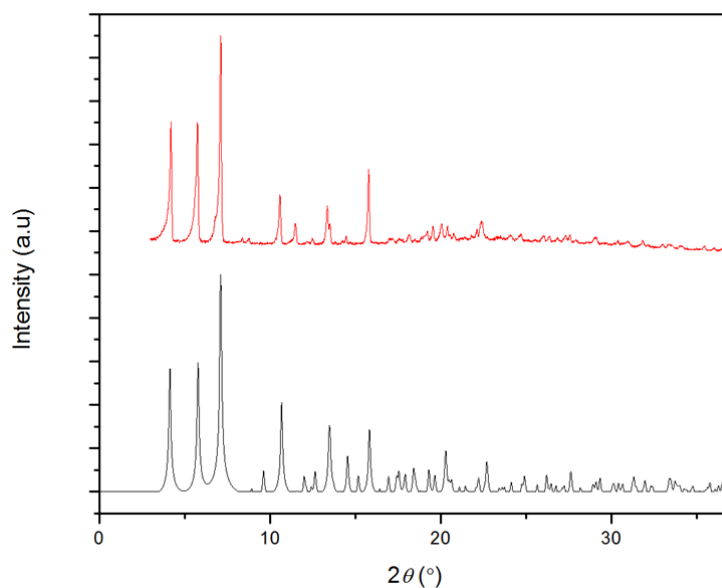

200

201 **Supplementary Figure 6: PXRD of SION-19.** Color scheme: black, theory; red, experimental.

202

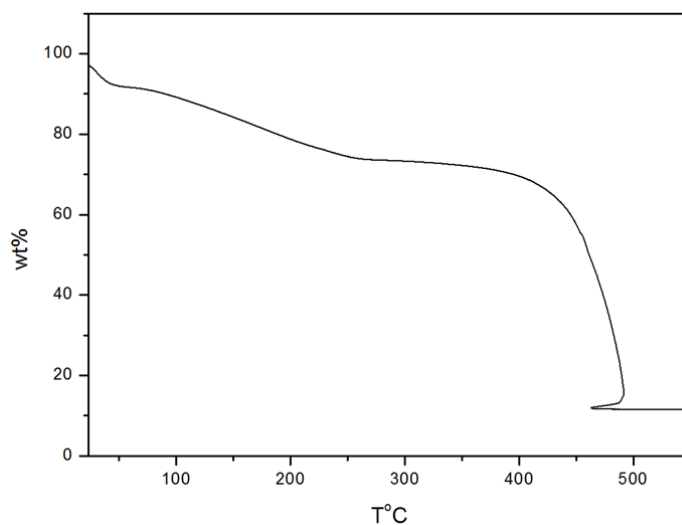

203

204 **Supplementary Figure 7: TGA analysis of SION-19.**

205

206

207 EA of the bulk phase reveals that the overall structure of **SION-19**,  $[\text{Zn}_{1.5}\text{O}_{0.25}(\text{Ade})(\text{TBAPy})_{0.5}]$   
208  $(\text{NH}_2\text{Me}_2)_{0.5} \cdot (\text{DMF})_{1.7} \cdot (\text{H}_2\text{O})_{4.0}$ , is comprised of 26.9% guest molecules. This is in good agreement with the  
209 27.9% loss in the TGA (Supplementary Figure 7). Here, the TGA profile shows two plateaus; the first occurs  
210 between 30-50°C and has an 8.8% weight loss attributed to the removal of guest H<sub>2</sub>O molecules (calculated  
211 9.2% loss), while the second occurs at 50-380 °C and corresponds to DMF and Me<sub>2</sub>NH<sub>2</sub><sup>+</sup>. Following the loss  
212 of the cations, the framework begins to decompose.

213

214

215

216

217

218

219

220

221

222

223

224

225

226

227

228

229

230

231

232

233

234 **Supplementary Discussion 4.2. Characterization of SION-19'.**

235 The phase purity of **SION-19'** was confirmed by the comparison of the experimental PXRD pattern with the  
236 simulated generated from the single crystal structure from the as made **SION-19** material. **SION-19'** was  
237 found to be air stable over a period of 6 months at ambient temperature while stored in a vial.

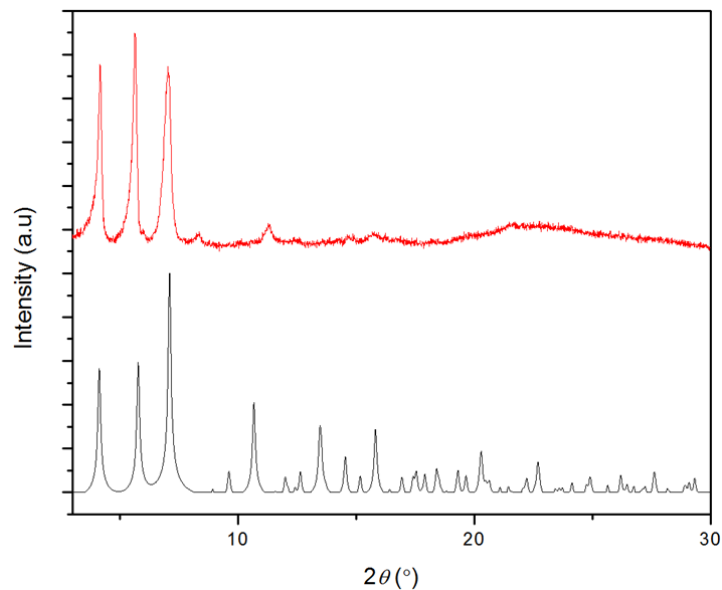

238

239 **Supplementary Figure 8:** PXRD of **SION-19'**. Color scheme: black, theory; red, experimental.

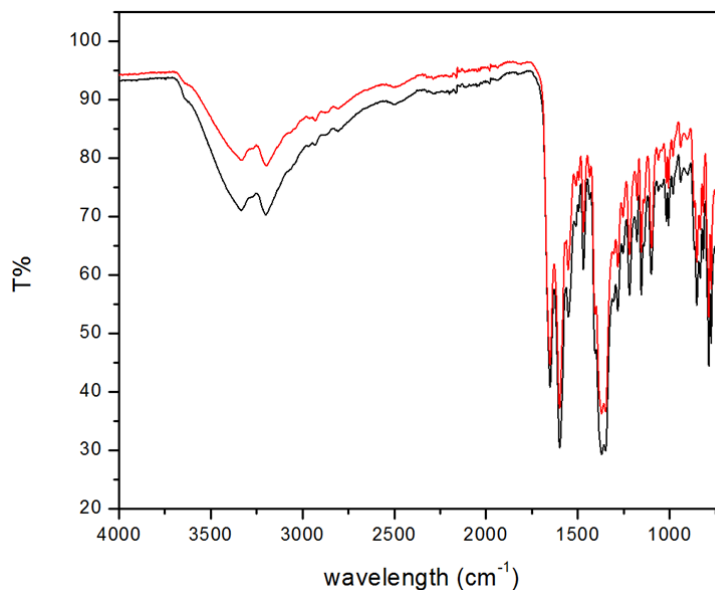

240

241 **Supplementary Figure 9:** IR. Colour scheme: Black, **SION-19**; red, **SION-19'**.

242

243

244

245 **Supplementary Table 2:** Elemental Analysis of **SION-19'**.

|                 | <b>Anal. Cald for:</b>                                                                                                                  | <b>Theory</b>                | <b>Experimental</b>          |
|-----------------|-----------------------------------------------------------------------------------------------------------------------------------------|------------------------------|------------------------------|
| <b>SION-19'</b> | $[\text{Zn}_{1.5}\text{O}_{0.25}(\text{Ade})(\text{TBAPy})_{0.5}]$<br>$(\text{NH}_2\text{Me}_2)_{0.5} \cdot (\text{H}_2\text{O})_{0.2}$ | C 55.99<br>H 3.22<br>N 12.83 | C 55.78<br>H 3.13<br>N 13.19 |

246

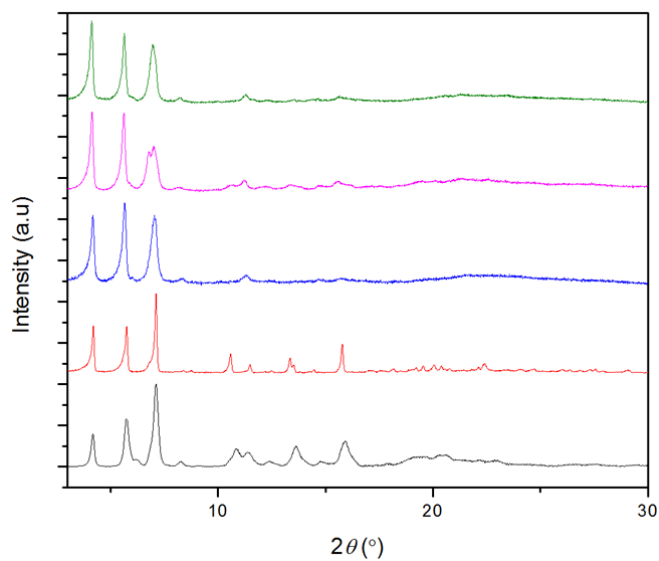

247

248 **Supplementary Figure 10:** Stability of **SION-19'** in DMF and EtOH. Color scheme: black, theory; red, **SION-**  
 249 **19'**; blue, **SION-19'**; pink, **SION-19'** immersion in DMF for 24 hrs; green, **SION-19'** immersion in EtOH for 24  
 250 hrs.

251

252

253

254

255

256

257

258

259

260

261 **Supplementary Discussion 4.3. Le Bail Fit of SION-19'.**

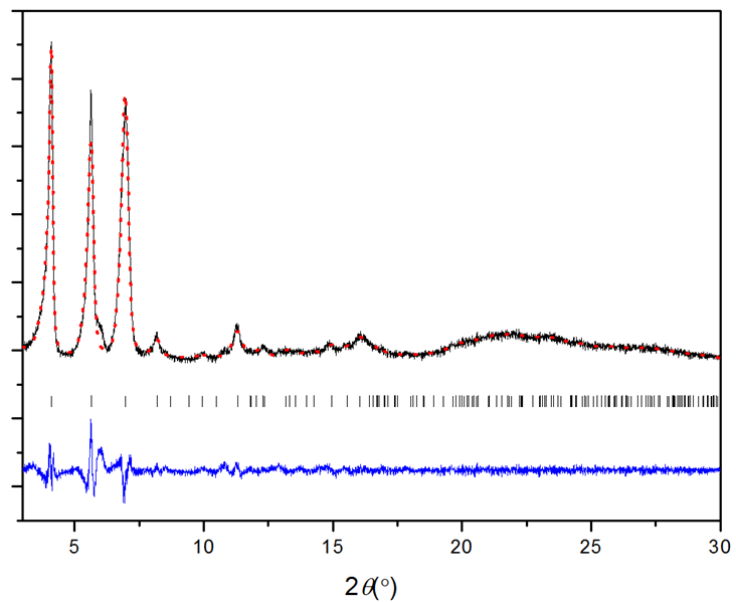

262

263 **Supplementary Figure 11:** Le Bail fit. Final observed (solid lines), calculated (circles) and difference (below)  
264 XRD for the Le Bail fit refinements of **SION-19'**.

265

266

267

268

269

270

271

272

273

274

275

276

277

278

279 **Supplementary Discussion 5. XPS of SION-19' Compared to H9Ade.**

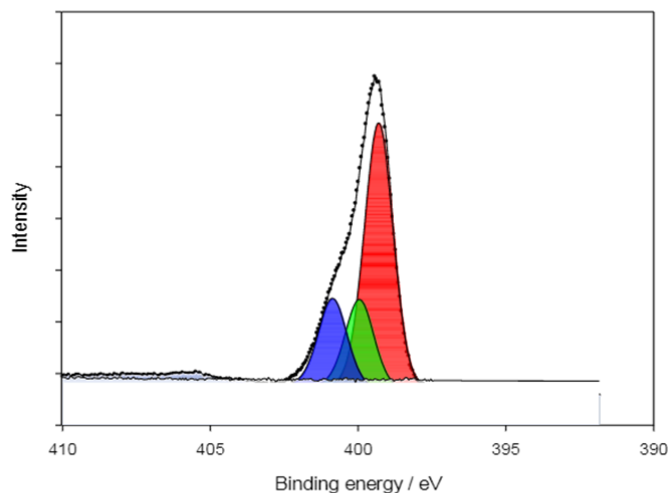

280

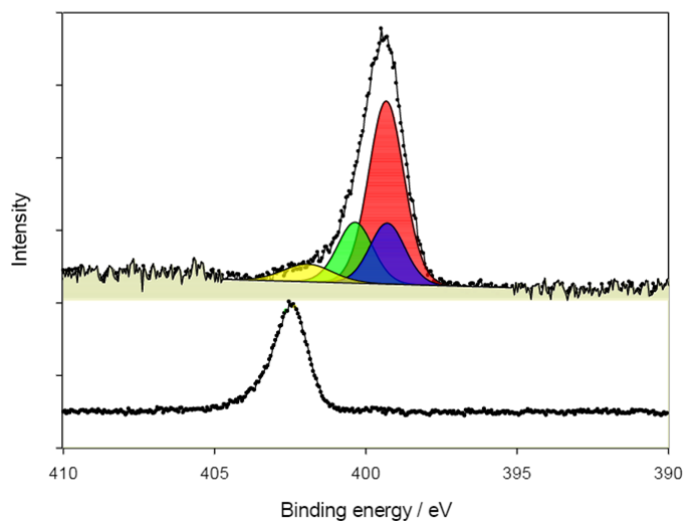

281

282 **Supplementary Figure 12:** Top: XPS N1s region of solid state Ade; Right, top: XPS N1s region of **SION-19**;  
283 Bottom, bottom: N1s XPS of NH<sub>2</sub>Me<sub>2</sub>Cl. All fitting parameters are described in the text below.

284

285 Three Gaussian-Lorentzian peaks were used to fit the spectrum, corresponding to the three peaks  
286 observed in the gas phase. Component A (red) corresponds to N1, N3, N7 of free adenine (H9Ade),  
287 component B (green) corresponds to N6 and component C (blue) corresponds to N9 (Supplementary Figure  
288 12). The component area ratio A : B : C was constrained according to the number of N atoms it comprised,  
289 i.e. to the ratio 3 : 1 : 1. The full width at half maximum (FWHM) of all components were constrained to be  
290 equal to give a more physically realistic model. The resulting components A, B and C have binding energies  
291 of 399.30, 399.96, and 400.87 eV respectively. The binding energy difference between components A and B  
292 and A and C is 0.66 eV and 1.57 eV respectively, compared with 1.3 eV and 2.3 eV in the gas phase  
293 molecule measured by Plekan et al.<sup>9</sup> Thus it can be seen that the N1s binding energies from the different N  
294 atoms in Ade become closer together in the solid state, presumably due to the influence of intermolecular

295 interactions, especially hydrogen bonding. The model applied to solid state H9Ade was used to model  
 296 spectra taken from **SION-19**. The binding energies of components A, B and C in **SION-19** are found at  
 297 399.33, 400.46 and 399.33 eV respectively (Supplementary Table 4). Additionally, a fourth component was  
 298 observed at 402.2 eV. This feature matches closely to the N1s peak observed in dimethyl ammonium  
 299 chloride (402.1 eV), suggesting that this or a similar ammonium ion is present within **SION-19**. This  
 300 observation confirms the presence of N<sup>+</sup> cations within the channels.

301

302 **Supplementary Table 3:** Binding energies of the fitted components for the N1s spectra. Compounds A, B  
 303 and C were constrained to have the same FWHM, and the peak areas were constrained to a ration of A:B:C  
 304 of 3:1:1. <sup>α</sup>Values in brackets are the differences of binding energies from component A.

|                                                 | Binding Energy (eV) of Component |                              |                            |       |
|-------------------------------------------------|----------------------------------|------------------------------|----------------------------|-------|
|                                                 | A                                | B                            | C                          | D     |
| <b>9HAde</b>                                    | 399.30                           | 399.96 (+0.66) <sup>α</sup>  | 400.87 (1.57) <sup>α</sup> | ---   |
| <b>SION-19</b>                                  | 399.33                           | 400.46 (-0.113) <sup>α</sup> | 399.33 (0) <sup>α</sup>    | 402.2 |
| <b>NH<sub>2</sub>Me<sub>2</sub><sup>+</sup></b> | ---                              | ---                          | ---                        | 402.1 |

305

306

307

308

309

310

311

312

313

314

315

316

317

318

319 **Supplementary Discussion 6. Porosity.**

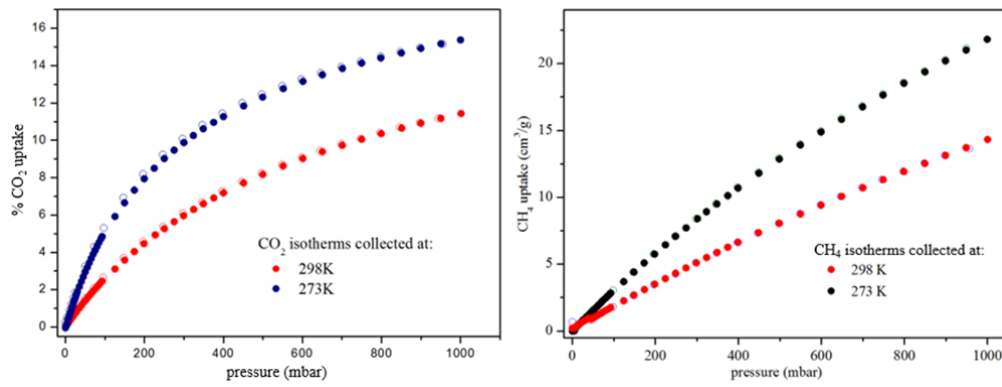

320

321 **Supplementary Figure 13:** CO<sub>2</sub> (left) and CH<sub>4</sub> (right) isotherms collected on **SION-19<sup>i</sup>** at 298 and 273 K.

322

323

324

325

326

327

328

329

330

331

332

333

334

335

336

337

338

339



340 **Supplementary Discussion 7. Thy loading of SION-19'.**

341 **Supplementary Discussion 7.1. Computational Methods.**

342 Due to the disorder of the pyrene rings in **SION-19**, the structure was initially prepared for computational  
343 simulations by removing all pyrene groups except for one. This was to ensure equidistance of the pyrene  
344 rings in the *a*-direction of the lattice (~5.5 Å). It was assumed that the disorder in these ligands is due to  
345 conformational flexibility (this was observed in the MD simulations discussed below), and thus the choice  
346 of which TBAPy ligand to keep was somewhat arbitrary. All additional disorder related to the positions of  
347 the ligand's benzoic acid groups could be eliminated once the choice of pyrene ring was made.

348 All DFT calculations were performed with the Vienna Ab-initio Simulation Package (VASP) version 5.3.5  
349 using the PBE exchange-correlation functional and the Projector Augmented Wave method.<sup>10-16</sup> The Kohn-  
350 Sham orbitals were expanded in a plane-wave basis up to a 1000 eV cutoff and the Brillouin zone was  
351 sampled using a 2x1x1 k-point grid centered at the gamma point.

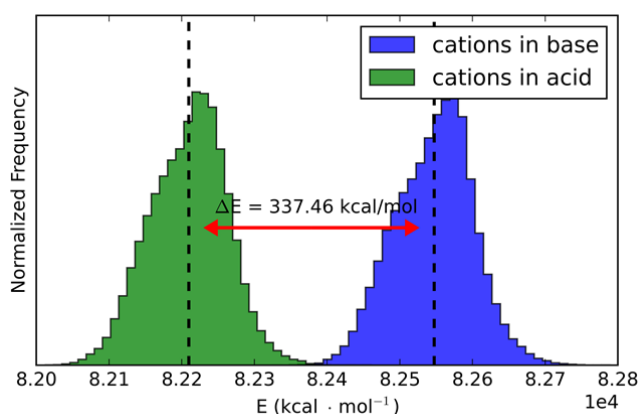

352

353 **Supplementary Figure 14:** Histogram of average internal energy of the **SION-19'** system containing charge-  
354 balancing  $[\text{NH}_2\text{Me}_2]^+$  ions in the acid (green) and base (blue) pores. The total average energy difference is  
355 337.46 kcal/mol in favor of the acid pore. There are 24 cations in the supercell of the simulation, resulting  
356 in  $\Delta E = 14$  kcal/mol per cation in favor of the acid pore. The simulations were run in the NPT ensemble, with  
357 energy data collected every femtosecond over the span of 2 nanoseconds.

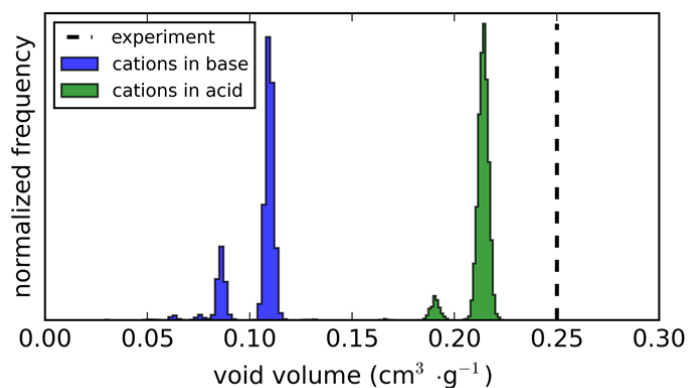

358

359 **Supplementary Figure 15:** Histogram of the accessible volumes of **SION-19'** computed over a 2ns NPT MD  
 360 simulation. Snapshots of the structure were taken every 2 ps. The x-axis represents the probe occupiable  
 361 accessible volume, computed using the technique presented in Ongari et al. as implemented in the zeo++  
 362 code version 0.3.<sup>17</sup> The average pore volume is computed to be: base (blue) = 0.104 cm<sup>3</sup>/g, acid (green) =  
 363 0.213 cm<sup>3</sup>/g. The experimental value of 0.246 cm<sup>3</sup>/g is in agreement with the accessible volume computed  
 364 when cations are in the acid pore.

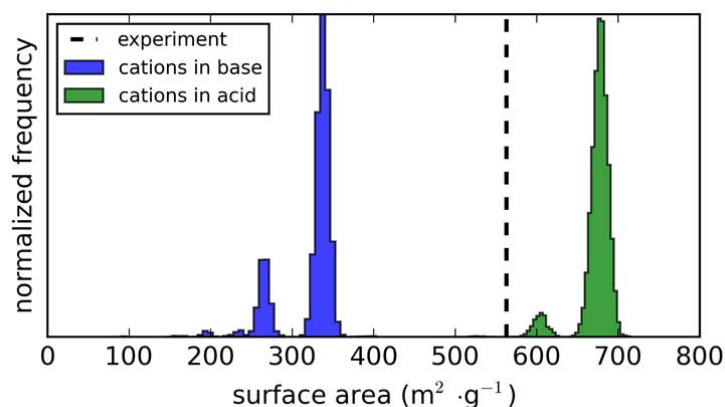

365

366 **Supplementary Figure 16:** Histogram of the surface area of **SION-19'** computed over a 2ns NPT MD  
 367 simulation. Snapshots of the structure were taken every 2 ps. The x-axis represents the geometric surface  
 368 area using a spherical probe of 1.82 Å using the zeo++ code version 0.3.<sup>17</sup> The average surface area is  
 369 computed to be: base (blue) = 321 m<sup>2</sup>/g, acid (green) = 672 m<sup>2</sup>/g. The experimental value of 563 m<sup>2</sup>/g is in  
 370 better agreement with the surface area computed when cations are in the acid pore.

371

372 The unit-cell of **SION-19** has a net anionic charge of -8 without charge-compensating extra-framework  
 373 cations. Partial atomic charges for this MOF were assigned by computing the DFT electrostatic potential,  
 374 ensuring an additional 8 electrons were included in the MOF (setting NELECT=3072 in VASP), and solving  
 375 the RESP-like equations as implemented in the REPEAT method, while constraining the system total charge  
 376 to -8.<sup>18</sup> A similar procedure was performed for a lone dimethyl ammonium cation *in vacuo* (the extra-  
 377 framework cation in this study), while constraining the total charge to +1 in both its REPEAT and VASP

378 calculations (setting NELECT=20 in the latter). In all subsequent classical simulations, 8 dimethyl ammonium  
379 cations with the partial charges computed in the procedure above were placed in the simulation unit cell to  
380 balance the net charge. The atomic charge assignments and Lennard-Jones parameters for the dimethyl  
381 ammonium atoms are presented in Supplementary Table 4, with atomic labels shown in Supplementary  
382 Figure 18.

383 Molecular Dynamics simulations (MD) were performed in the Large-scale Atomic/Molecular Massively  
384 Parallel Simulator (LAMMPS) version 10Aug15.<sup>19</sup> DREIDING potentials were used to model the fully-flexible  
385 MOF, cations, and free thymine nucleobases in the pores.<sup>20</sup> Included with the typical non-bonded  
386 interactions of DREIDING is a 3-bodied Morse hydrogen bond potential described in equation SE1.

$$E_{Morse}^{H-bond} = D_0(e^{-2\alpha(r-R_0)} - 2e^{-\alpha(r-R_0)})\cos^n\theta \quad (\text{SE1})$$

387

388 Where  $D_0$  is the well-depth of the potential,  $\alpha$  is an exponential factor, and  $R_0$  is the equilibrium H-bond  
389 distance between the H-bond donor and acceptor atoms, while  $\theta$  describes the angle formed between the  
390 heavy atoms and the hydrogen. In this study, the value for  $n$  was set to 2. The original DREIDING  
391 parameters for this potential were modified by Liu *et al.* to improve energetics of hydrogen bonds in  
392 nitrogen-containing dendrimers.<sup>21</sup> This work uses the modified parameters, where possible, of Liu *et al.* to  
393 model the H-bonds of Ade-Thy. Exceptionally, we have adjusted the N\_R – N\_R hydrogen bonding  
394 equilibrium distance ( $R_0$ ) to match that of the DFT optimized distance of 2.72 Å. The values of the H-  
395 bonding parameters used in this work are presented in Supplementary Table 5.

396 No partial atomic charges were assigned to Thy, due to observed over-binding of Thy to Ade in isolated  
397 simulations. The energy of the base-pair was computed to be -19.6 kcal/mol with the 3-bodied Morse  
398 potentials. This is comparable to the DFT binding energy of -18.24 kcal/mol.

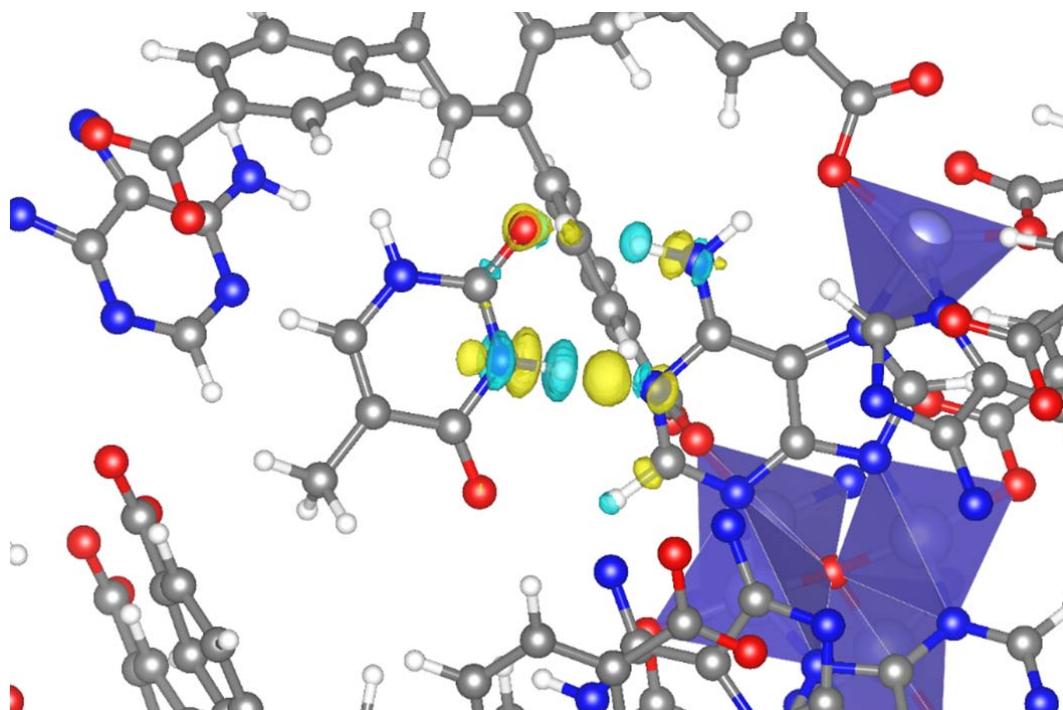

399

400 **Supplementary Figure 17:** Charge difference isosurface between hydrogen bonded Thy in **SION-19'** and  
 401 their isolated species. The isovalue of this plot is set to  $0.004 \text{ e}/\text{\AA}^3$ . Negative isosurfaces presented in light  
 402 blue and positive isosurfaces shown in yellow. Bader population analysis on the charge density of these  
 403 species suggest a polarization of charge in the hydrogen bonded structure. The Thy oxygen becoming  
 404 slightly positive ( $+0.06e$ ) and the Thy hydrogen becoming slightly negative ( $-0.06e$ ).

405

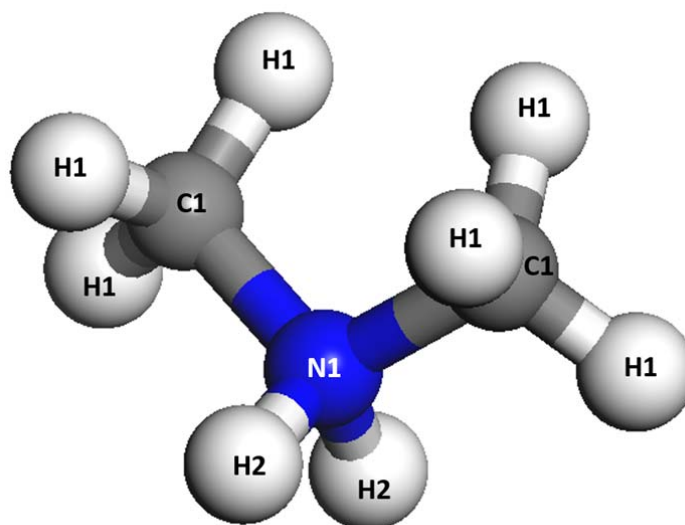

**Supplementary Figure 18:** Dimethyl ammonium cation with atomic labels.

406

407

**Supplementary Table 4:** non-bonded interaction parameters of dimethyl ammonium cation. Atom labels correspond to the labels presented in Supplementary Figure 18.

| Atom | Partial charge (e) | Lennard-Jones $\epsilon$<br>(kcal/mol) | L-J $\sigma$ (Å) |
|------|--------------------|----------------------------------------|------------------|
| N1   | -0.12              | 0.0774                                 | 3.263            |
| H1   | +0.33              | 0.0152                                 | 2.846            |
| H2   | +0.17              | 0.0152                                 | 2.846            |
| C1   | -0.28              | 0.0951                                 | 3.473            |

408

**Supplementary Table 5:** Morse H-bond potentials used in this work for framework Ade and free Thy.

| Donor - Acceptor | $D_0$ (kcal/mol) | $\alpha$ (1/Å) | $R_0$ (Å) |
|------------------|------------------|----------------|-----------|
| N_R – N_R        | 9.50             | 1.838          | 2.72      |
| N_R – N_3        | 8.45             | 1.761          | 2.84      |
| N_R – O_2        | 9.50             | 1.818          | 2.75      |
| N_R – O_R        | 9.50             | 1.667          | 3.00      |

409

410 Simulations sampling the canonical ensemble were performed for a total of 2.4 ns (2 ns production and 400  
 411 ps equilibration). During equilibration, the framework, cations and Thy molecules were subjected to three  
 412 separate Langevin thermostats to reduce the undesirable oscillations observed with Nosé-Hoover  
 413 thermostats, while the production run was governed by individual Nosé-Hoover thermostats with 3 chains  
 414 each.

415 The zeo++-0.3 program was used to compute the time dependent surface area of **SION-19**,<sup>17, 22-24</sup> where  
 416 every 100 fs, a snapshot of the simulation was extracted using the MDAnalysis python library.<sup>25, 26</sup> For each  
 417 snapshot, a probe radius of 1.82 Å was used to mimic a N<sub>2</sub> BET-like surface area, and 10,000 points were  
 418 sampled on the MOF surface.

419

420

421

422

423

424

425

426 **Supplementary Discussion 7.2. Characterization of SION-19@Thy.**

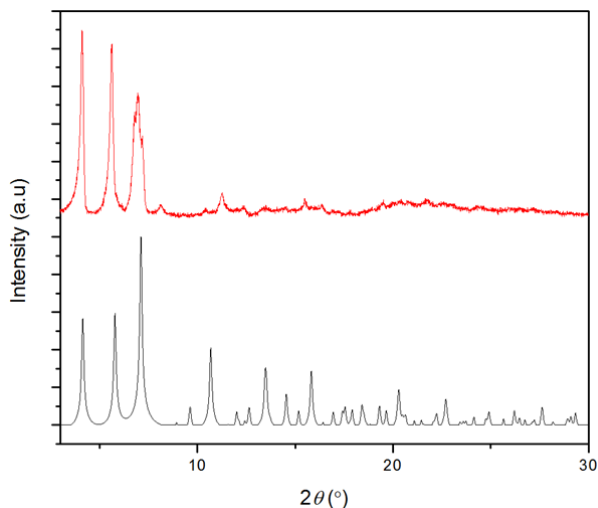

427

428 **Supplementary Figure 19:** PXRD of **SION-19@Thy**. Color scheme: black, theory; red, experimental.

429

430 **Supplementary Table 6:** Elemental Analysis of **SION-19**

|                | Anal. Cald for:                                                                                                                                                               | Theory                       | Experimental                 |
|----------------|-------------------------------------------------------------------------------------------------------------------------------------------------------------------------------|------------------------------|------------------------------|
| <b>SION-19</b> | $[\text{Zn}_{1.5}\text{O}_{0.25}(\text{Ade})(\text{TBAPy})_{0.5}] \cdot (\text{NH}_2\text{Me}_2)_{0.5}$<br>$(\text{Thy})_{0.95}(\text{EtOH})_{1.1}(\text{H}_2\text{O})_{1.5}$ | C 52.86<br>H 4.32<br>N 13.05 | C 53.17<br>H 4.13<br>N 13.32 |

431

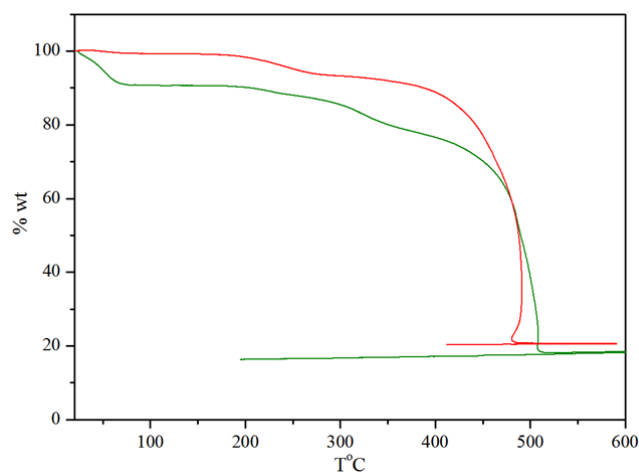

432

433 **Supplementary Figure 20:** TGA analysis. Color scheme: red, **SION-19'**; green, **SION-19@Thy**

434 The TGA for **SION-19'** and **SION-19@Thy** (Supplementary Figure 20) were collected up to 600 °C under air.

435 For **SION-19'** there is a minor loss at 170 °C of 0.2 % corresponding to the removal of H<sub>2</sub>O absorbed upon

436 exposure to air. The loss observed between 170-355 °C is attributed to the removal of [NH<sub>2</sub>Me<sub>2</sub>]<sup>+</sup> followed

437 by the collapse of the material. For **SION-19@Thy**, the first plateau corresponds to a loss of EtOH and H<sub>2</sub>O,  
438 while a 16.2 % loss between 170-400 °C is synonymous with the loss of cations, Thy molecules, and  
439 subsequent collapse of the MOF.

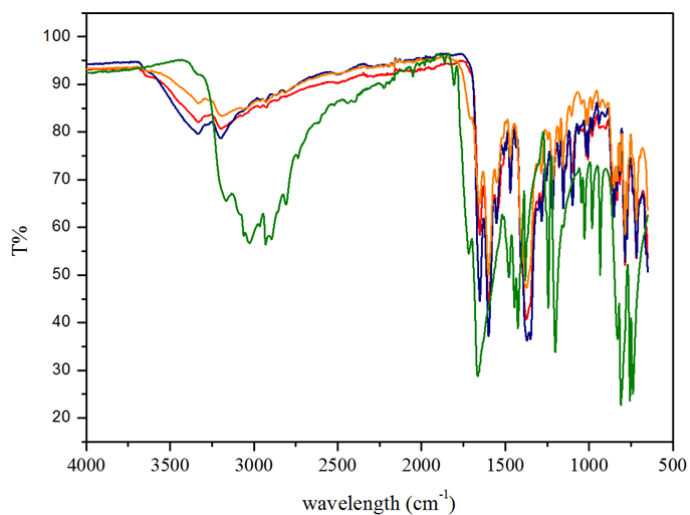

440

441 **Supplementary Figure 21:** IR. Colour scheme: Blue, **SION-19**; red, **SION-19'**; orange, **SION-19@Thy**; green,  
442 Thy.

443

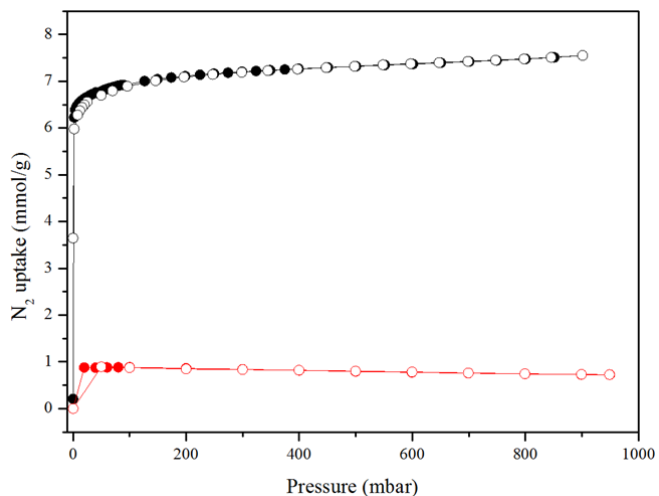

444

445 **Supplementary Figure 22:** Type I N<sub>2</sub> isotherm measured on **SION-19'** (black) and **SION-19@Thy** (red) at 77 K  
446 and 1 bar (filled symbols: adsorption, empty: desorption).

447

448

449

450

451 **Supplementary Discussion 7.3. MAS  $^1\text{H}$  and  $^{13}\text{C}$  NMR Experiments.**

452 Variable-temperature  $^{13}\text{C}$  (125.7 MHz) NMR spectra were acquired on a Bruker Advance III 11.7 T  
453 spectrometer equipped with a 3.2 mm low-temperature CPMAS probe. A recycle delay of 2 to 4 seconds,  
454 and a contact time of 3 ms were used in the CP experiment. The spectra were referenced to the CH signal  
455 of solid adamantane (29.06 ppm), used as a secondary reference.

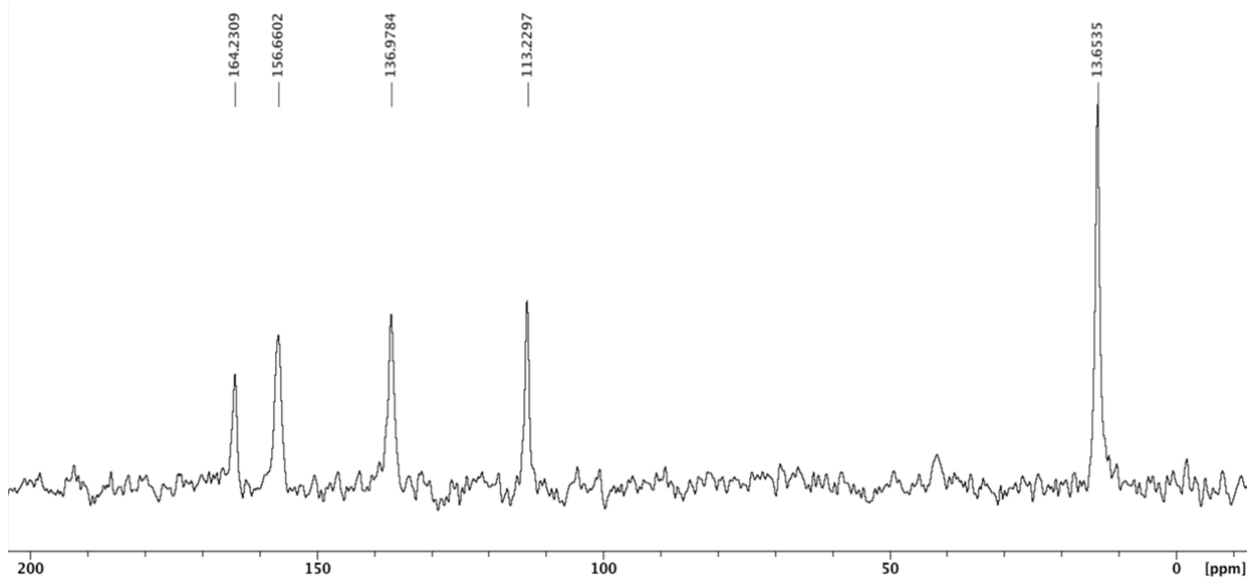

456

457 **Supplementary Figure 23: MAS  $^1\text{H}$  NMR of Thymine, 300K, 12000 Hz.**

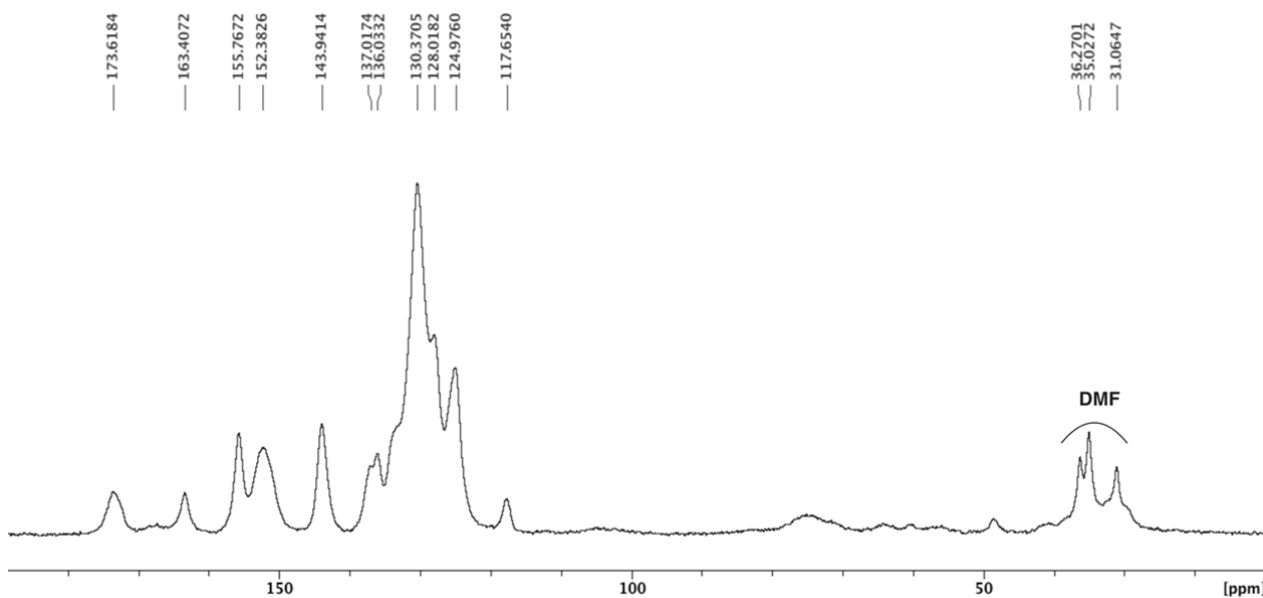

458

459 **Supplementary Figure 24: MAS  $^{13}\text{C}$  NMR of SION-19, 300K, 12000 Hz.**

460



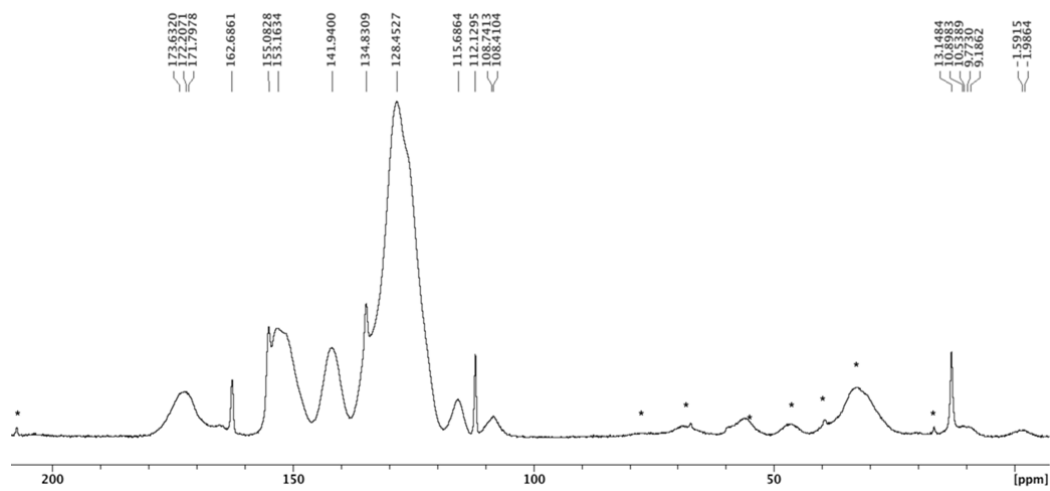

461

462 **Supplementary Figure 25:** MAS  $^1\text{H}$ - $^{13}\text{C}$  NMR of **SION-19@Thy**, 103K, 12000 Hz.

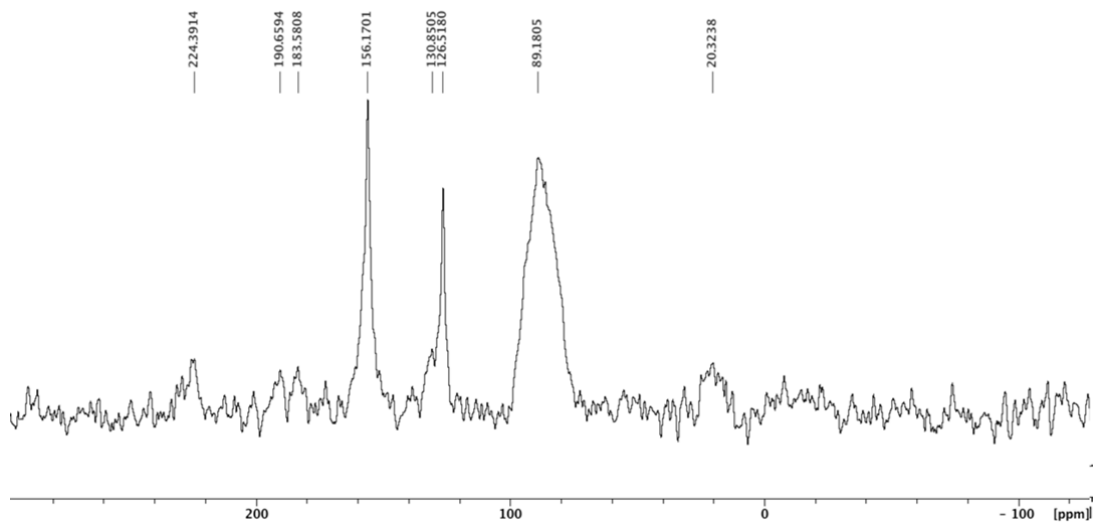

463

464 **Supplementary Figure 26:** MAS  $^1\text{N}$  CP NMR of **SION-19@Thy**, 100K, 12000 Hz. Peaks correspond to:  $\delta$  Thy  
 465 (N3), 156.1701; Thy (N1) 126.5180-130.8505; and Ade (NH<sub>2</sub>) 89.1805.

466

467

468

469

470

471

472

473

474 **Supplementary Discussion 8. Characterization of Thymine Dimer and SION-19'@UV-Thy.**

475 **Supplementary Discussion 8.1. Synthesis and Characterization of Thy<>Thy.**

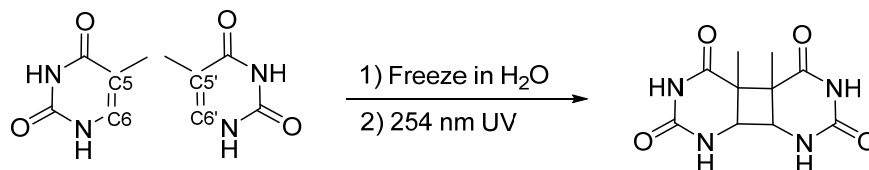

477 **Supplementary Scheme 1:** Synthesis of cyclobutane thymine photodimers and possible radical reaction  
478 mechanism.

479 The synthesis of the cyclobutane Thy photodimers was adapted from previously reported methods  
480 (Supplementary Scheme 1).<sup>27-29</sup> In a 1 L volumetric flask, Thy (360 mg, 2.85 mmol) was dissolved in Millipore  
481 water. The solution was transferred into a plastic container, which was placed in a Styrofoam container  
482 filled with dry ice, and rapidly frozen. The solid block of ice was broken up, placed under a UV-lamp, and  
483 irradiated at 254 nm for 5 hours. This procedure was repeated twice to ensure a high yield of Thy<>Thy.  
484 After, the water was removed by rotary evaporator, and washed with hot absolute ethanol to remove any  
485 unreacted Thy. Yield 6 % (47 mg, 0.183 mmol), <sup>1</sup>H NMR (400 MHz, DMSO): δ 7.63 (s, 2H); 3.68 (s, 2H); 1.31  
486 (s, 6H).<sup>30</sup>

487

488

489

490

491

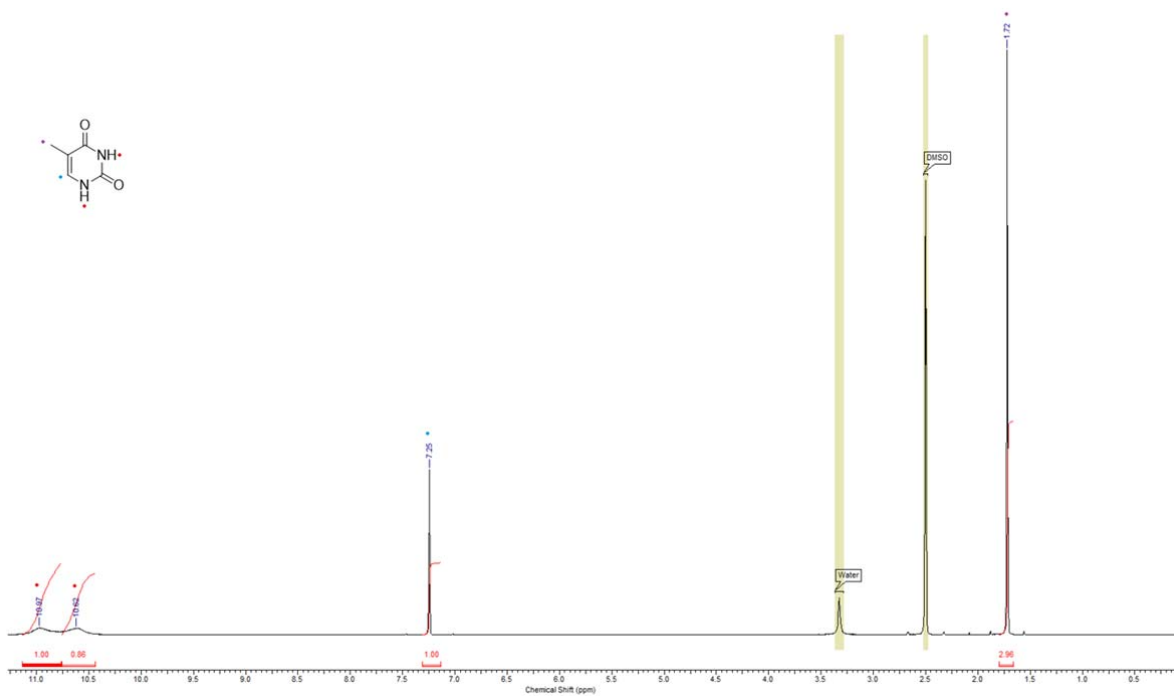

492

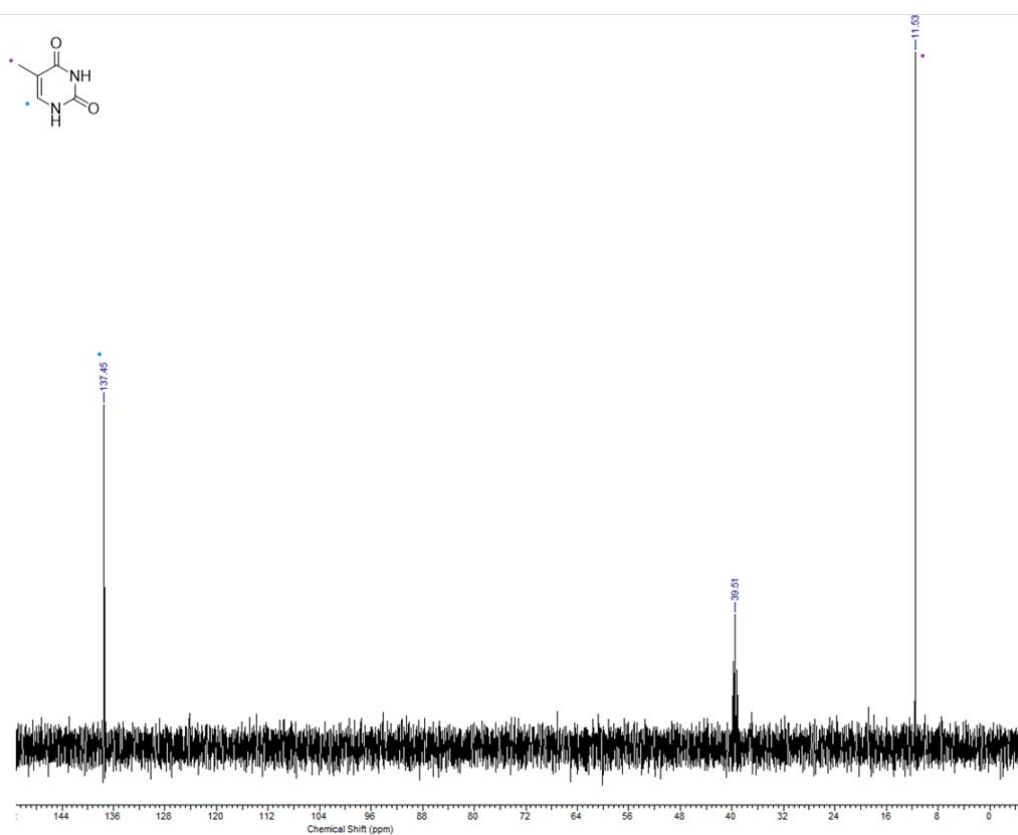

493

494 **Supplementary Figure 27:** Top:  $^1\text{H}$  NMR and bottom: DEPT-135  $^{13}\text{C}$  of Thy exposed for 72 hours of UV light  
 495 (254 nm). Measurements done in  $d_4$ -DMSO.

496

497

498 **Supplementary Discussion 8.2. Loading SION-19' with Thy<>Thy.**

499 Following the same procedure previously discussed for the Thy isotherms, desolvated ground host material  
500 (50 mg), **SION-19'**, was immersed in MeCN (due to insolubility of Thy<>Thy in EtOH) which contained a  
501 100% loadings of Thy<>Thy. Equilibrium was established after 24 hours, after which the material was  
502 filtered and allowed to air dry before routine characterization.

503 **Supplementary Discussion 8.3. Characterization of SION-19@Thy<>Thy.**

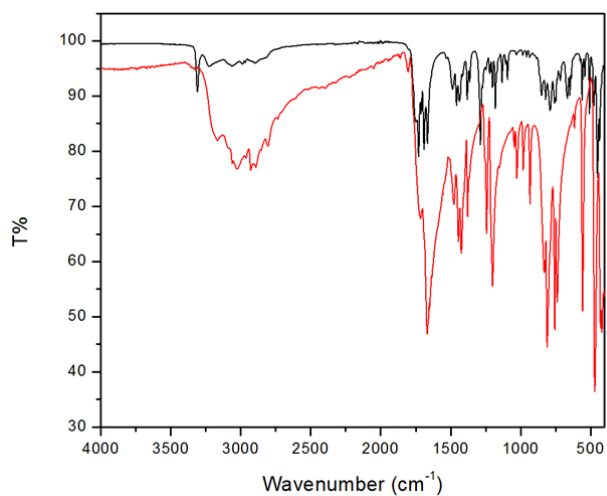

504

505 **Supplementary Figure 28:** IR spectrum. Color scheme: red, Thy; black, Thy<>Thy.

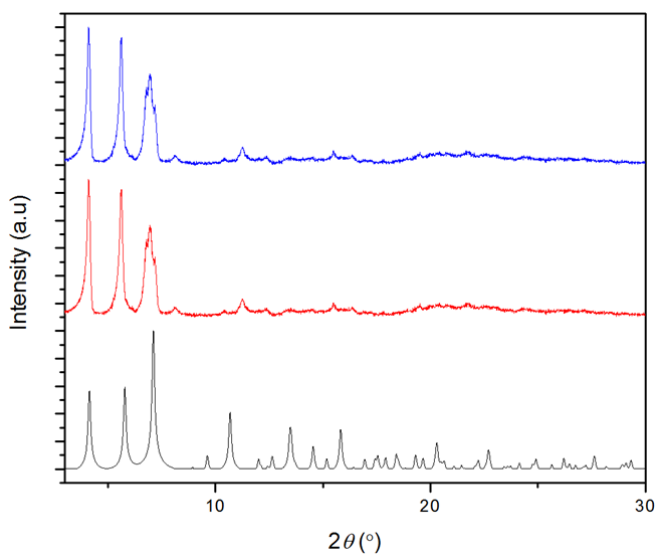

506

507 **Supplementary Figure 29:** PXRD. Color scheme: black, experimental; red, **SION-19@Thy(40%)**; blue, **SION-**  
508 **19@UV-Thy(40%)** exposed to UV/Vis for 24 hrs.

509

510

511 **Supplementary Discussion 8.4. Ultra High Performance Liquid Chromatograph Mass Spectrometry.**

512 Analysis of each sample by UHPLC-EIS/MS was performed at room temperature by taking 100 µL of each  
 513 sample prepared in section 8.4 and diluting it with 1 mL of deionized water. Injection volumes of 30 µL  
 514 were used along with the following solvent (HPLC grade Acetonitrile) gradient (Supplementary Table 7-8),  
 515 and parameters for the Full MS-SIM and PRM scans.

516 **Supplementary Table 7:** The following solvent gradient for UHPLC-EIS/MS was applied to Thy, Thy<>Thy  
 517 and destroyed material **SION-19@UV-Thy (20-80%)** that was exposed to 24 hrs of 254 nm UV.

|          | Retention (min) | Flow (mL/min) | % MeCN |
|----------|-----------------|---------------|--------|
| <b>1</b> | 0.000           | 0.300         | 2.0    |
| <b>2</b> | 0.000           | 0.300         | 2.0    |
| <b>3</b> | 1.000           | 0.300         | 2.0    |
| <b>4</b> | 5.000           | 0.300         | 20.0   |
| <b>5</b> | 6.000           | 0.300         | 80.0   |
| <b>6</b> | 7.000           | 0.300         | 80.0   |
| <b>7</b> | 7.100           | 0.300         | 2.0    |
| <b>8</b> | 10.000          | 0.300         | 2.0    |

518

519 **Supplementary Table 8:** Parameters and properties of the global settings, Full MS-SIM and PRM scans.

|                         | Properties of Methods |                     |          |
|-------------------------|-----------------------|---------------------|----------|
|                         | Global Settings       | Full MS-SIM         | PRM      |
| <b>Runtime (min)</b>    | 10                    | 0 to 2.29<br>3.5-10 | 2.3-3.5  |
| <b>Polarity</b>         | -----                 | Positive            | Positive |
| <b>Resolution</b>       | -----                 | 30,000              | 30,000   |
| <b>AGC Target</b>       | -----                 | 1e6                 | 5e5      |
| <b>Max IT</b>           | -----                 | 200 ms              | 100 ms   |
| <b>Scan Range</b>       | -----                 | 100-800 m/z         | -----    |
| <b>Isolation window</b> | -----                 | -----               | 1.0 m/z  |

520

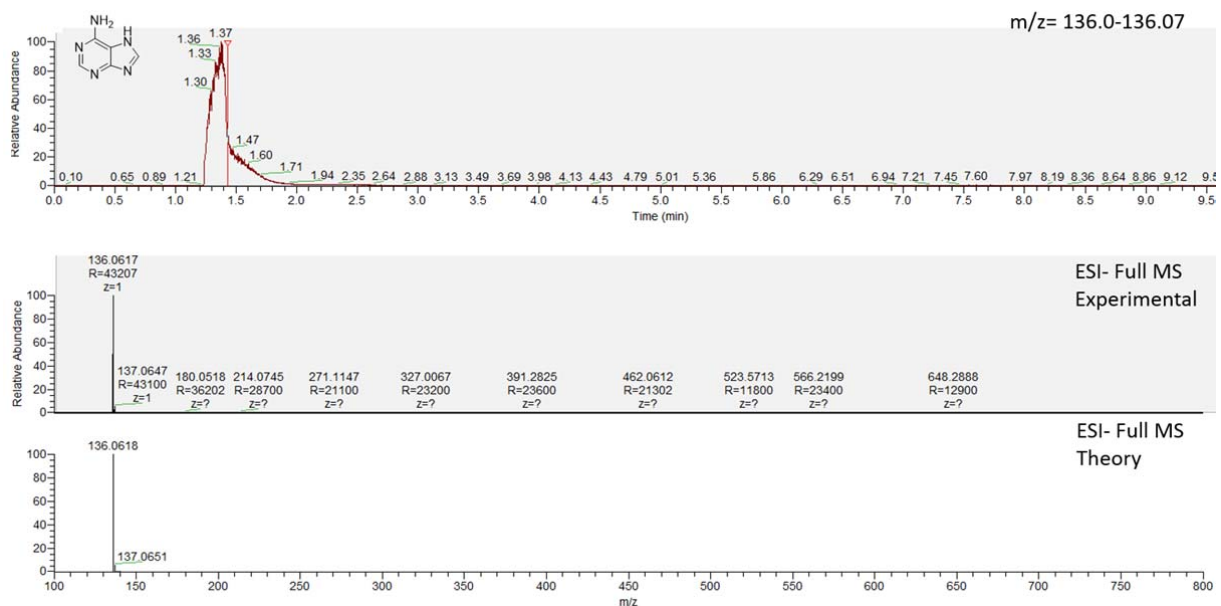

521

522 **Supplementary Figure 30:** Ade UHPLC-EIS/MS elution time (1.36 min), as well as the experimental and  
 523 theoretical ESI-Full MS spectra. The parent ion peak here is found at 136.0617 m/z and is in good  
 524 agreement with the theoretical ESI-Full MS peak at 136.0618 m/z. Here, a 250 nM sample was used along  
 525 with 20  $\mu$ L injection volumes.

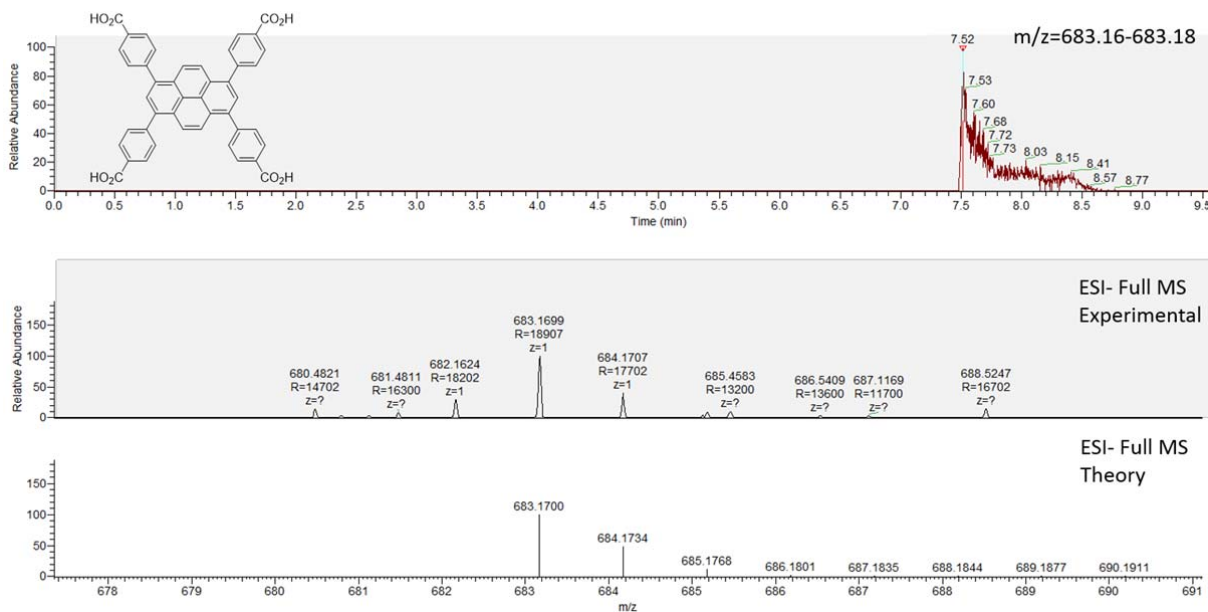

526

527 **Supplementary Figure 31:** TBAPy UHPLC-EIS/MS elution time (7.52 min), as well as the experimental and  
 528 theoretical ESI-Full MS spectra. The parent ion peak here is found at 683.1699 m/z and is in good  
 529 agreement with the theoretical ESI-Full MS peak at 683.1700 m/z. Here, a 250 nM sample was used along  
 530 with 20  $\mu$ L injection volumes.

531

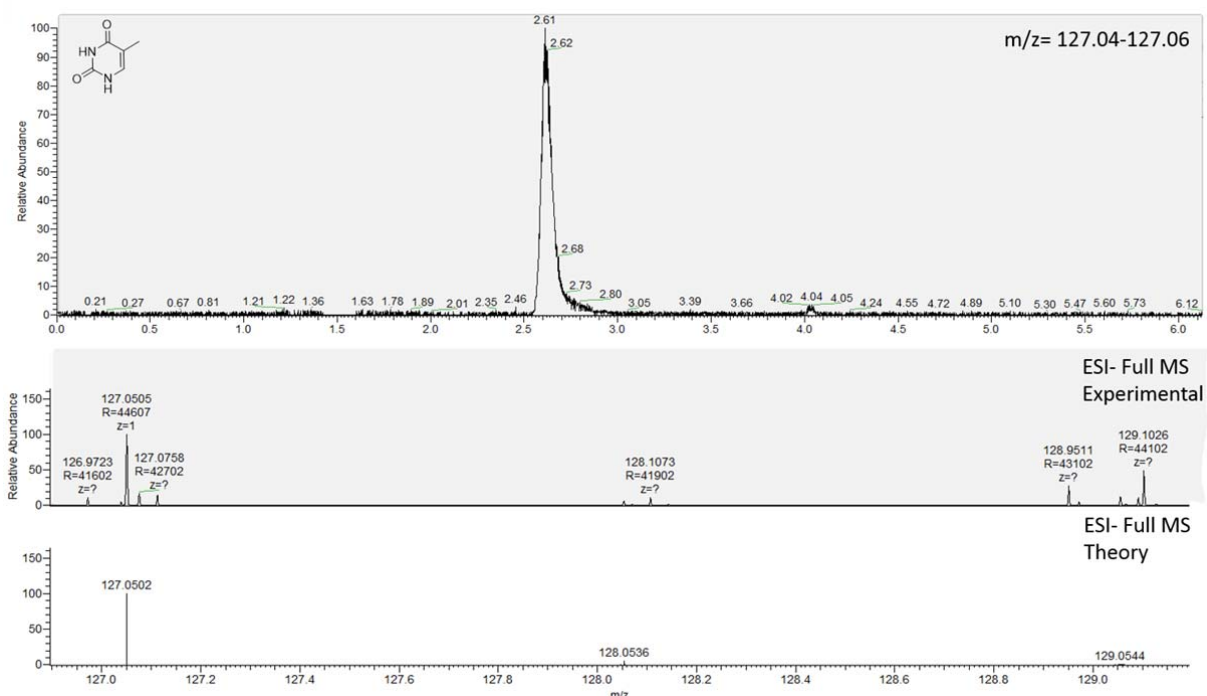

532  
 533 **Supplementary Figure 32:** Thy UHPLC-EIS/MS elution time (2.61 min), as well as the experimental and  
 534 theoretical ESI-Full MS spectra. The parent ion peak here is found at 127.0505 m/z and is in good  
 535 agreement with the theoretical ESI-Full MS peak at 127.0502 m/z. Here, a 250 nM sample was used along  
 536 with 20  $\mu$ L injection volumes.

537  
 538  
 539  
 540  
 541  
 542  
 543  
 544

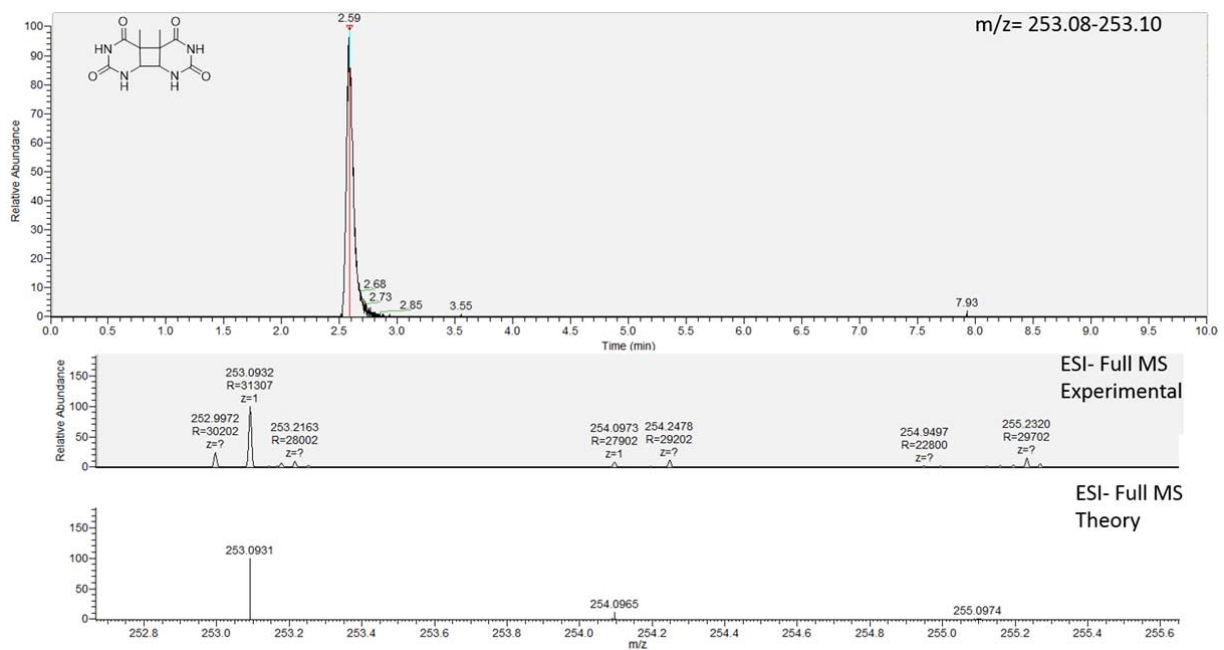

545

546 **Supplementary Figure 33:** Thy $\leftrightarrow$ Thy UHPLC-EIS/MS elution time (2.59 min), as well as the experimental  
 547 and theoretical ESI-Full MS spectra. The parent ion peak here is found at 253.0932 m/z and is in good  
 548 agreement with the theoretical ESI-Full MS peak at 253.0931 m/z. Here, a 250 nM sample was used along  
 549 with 30  $\mu$ L injection volumes.

550

551

552

553

554

555

556

557

558



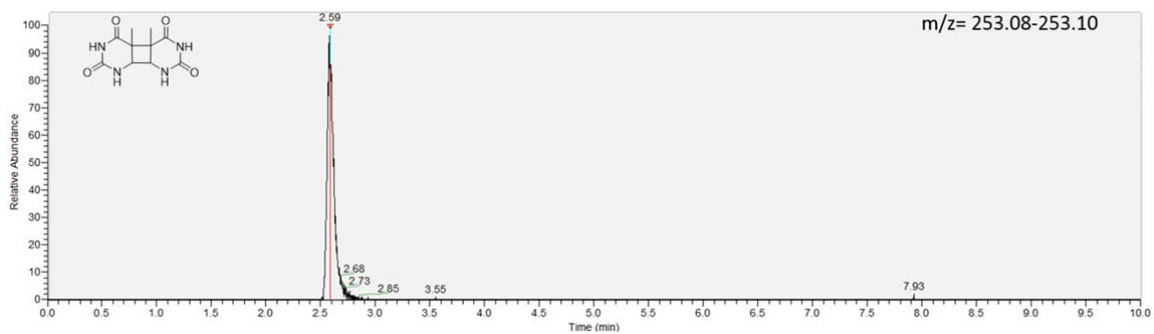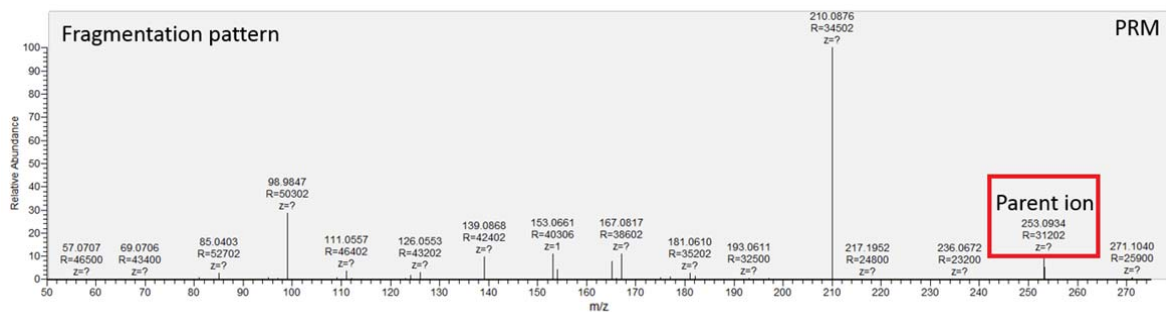

561 **Supplementary Figure 34:** Thy<>Thy UHPLC-EIS/MS elution time (2.59 min), and parallel reaction  
 562 monitoring (PRM) to determine the fragmentation pattern. Two major fragments at 210.0676 m/z and  
 563 98.9847 m/z can be seen along with the parent ion (253.0934 m/z). These three peaks, along with the  
 564 proper elution time, were later used to determine the presence of Thy<>Thy in each sample. Here, a  
 565 250nM sample was used along with 30  $\mu$ L injection volumes.

566

567 Initial UHPLC-EIS/MS runs were performed on standards of both free Thy and Thy<>Thy to determine their  
 568 elution times, parent ion peaks, and PRM fragmentation pattern which were later compared to samples of  
 569 **SION-19@UV-Thy (20-80%)**, which were exposed to UV (254 nm), and subsequently destroyed.

570

571

572

573

574

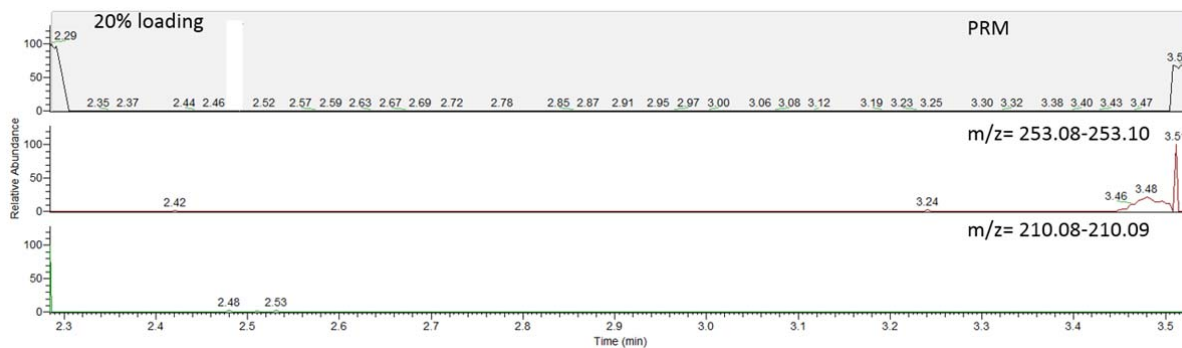

575

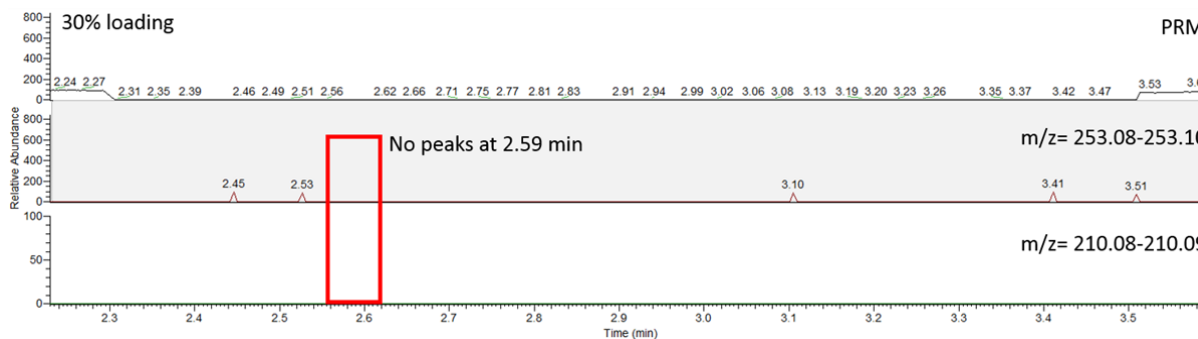

576

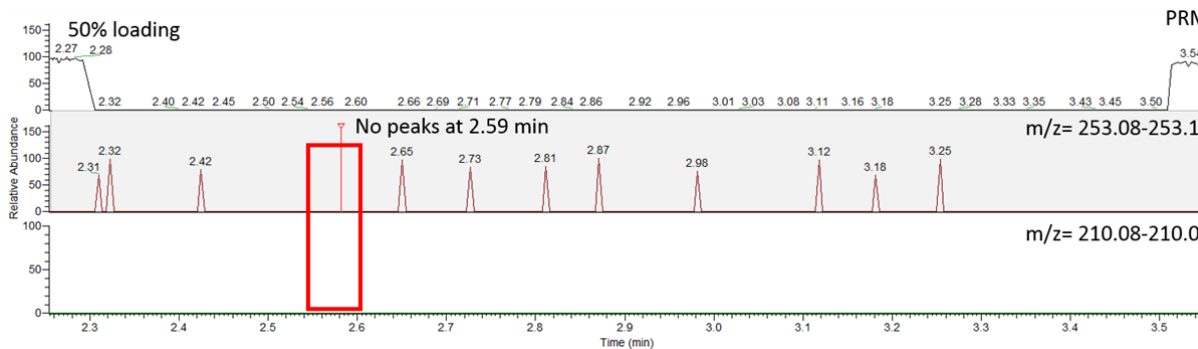

577

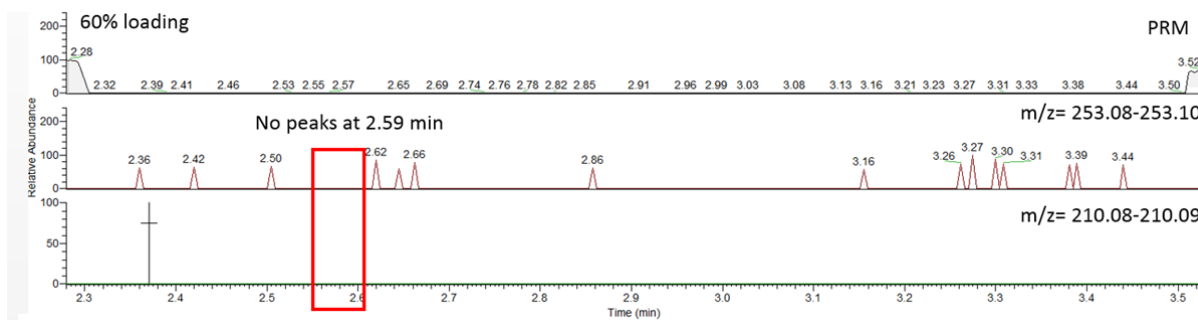

578

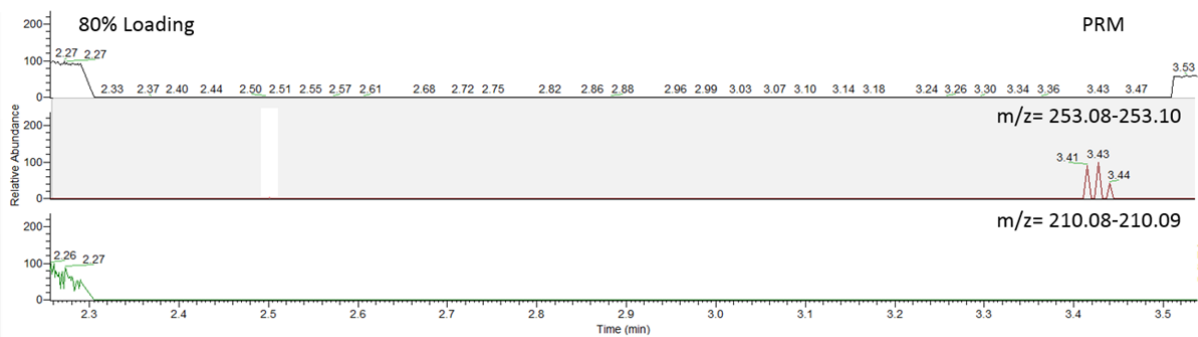

579

580 **Supplementary Figure 35: SION-19@UV-Thy (20-30%, 50-80%) UHPLC-EIS/MS parallel reaction monitoring**  
 581 **(PRM) between 2.3-3.5 min. No parent ion peaks were found.**

582

583

584

585

586

587

588

589

590

591

592

593

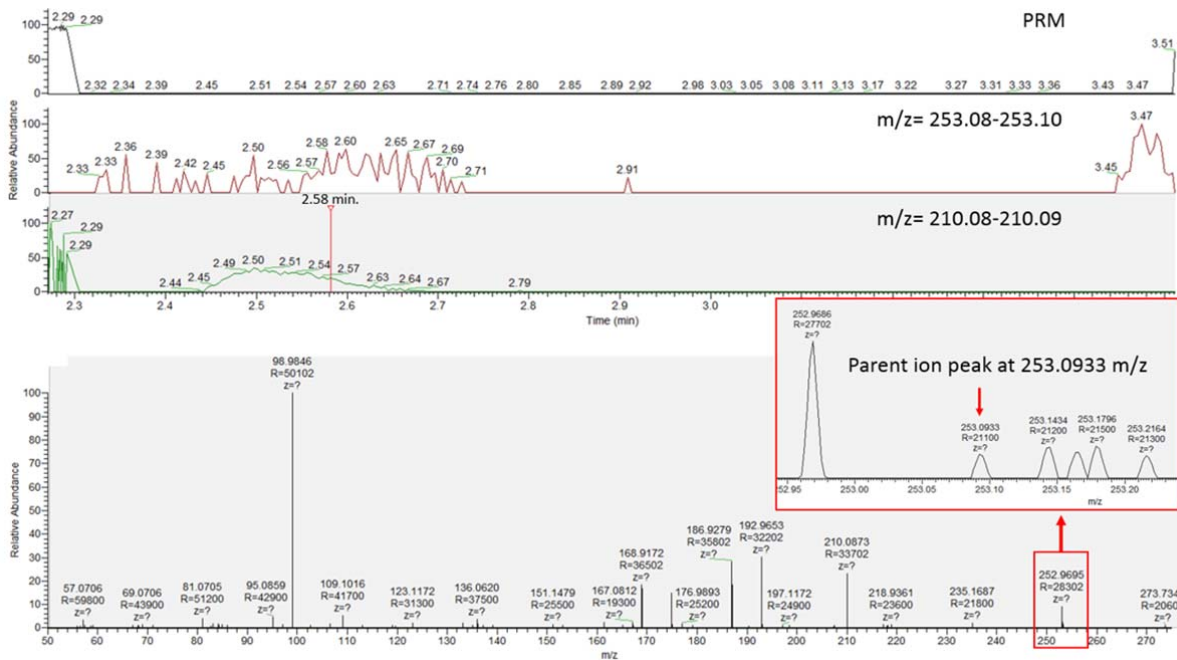

594

595 **Supplementary Figure 36: SION-19@UV-Thy(40%), Trial 1: UHPLC-EIS/MS parallel reaction monitoring**  
 596 (PRM) between 2.3-3.5 min. searching for a mass of 253.08-253.10 afforded multiple peaks at different  
 597 elution times. At an elution time of 2.58 min. a broad peak for 210.08-210.09 m/z can be seen, which  
 598 corresponds to a fragmentation pattern of 253.0933 (parent ion), 210.0873 and 98.9846 m/z. Which are all  
 599 in good agreement with the reference Thy<>Thy pattern with 253.0934 (parent ion), 210.0876 and 98.9847  
 600 m/z.

601

602

603

604

605

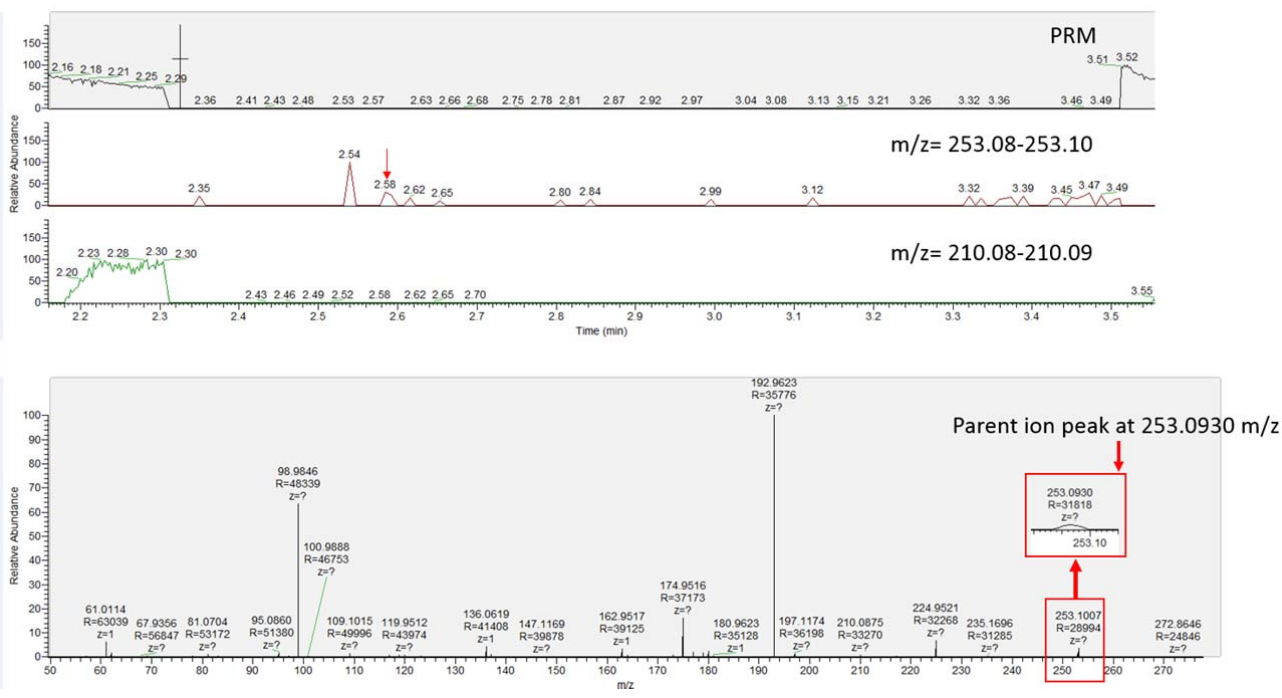

606

607 **Supplementary Figure 37: SION-19@UV-Thy(40%), Trial 2:** UHPLC-EIS/MS parallel reaction monitoring  
 608 (PRM) between 2.3-3.5 min. searching for a mass of 253.08-253.10 afforded multiple peaks at different  
 609 elution times. At an elution time of 2.58 min. a low broad peak for 210.08-210.09 m/z can be seen, which  
 610 corresponds to a fragmentation pattern of 253.0930 (parent ion), 210.0875 and 98.9846 m/z. Which are all  
 611 in good agreement with the reference Thy<>Thy pattern with 253.0934 (parent ion), 210.0876 and 98.9847  
 612 m/z.

613

614

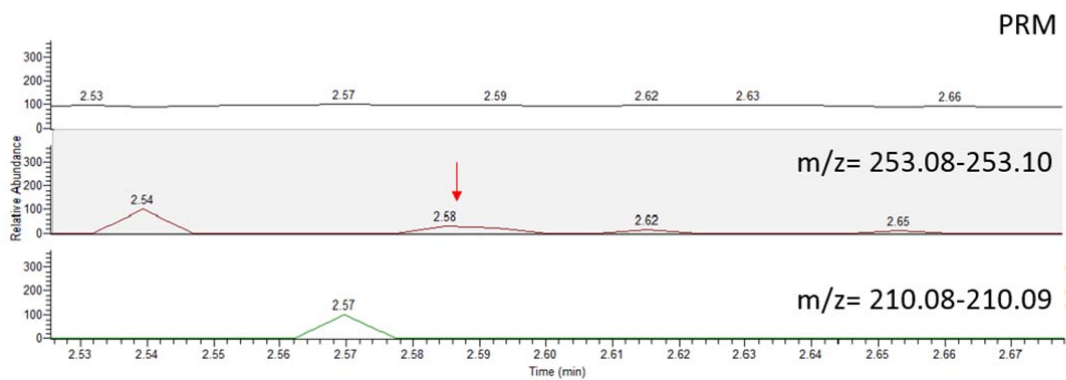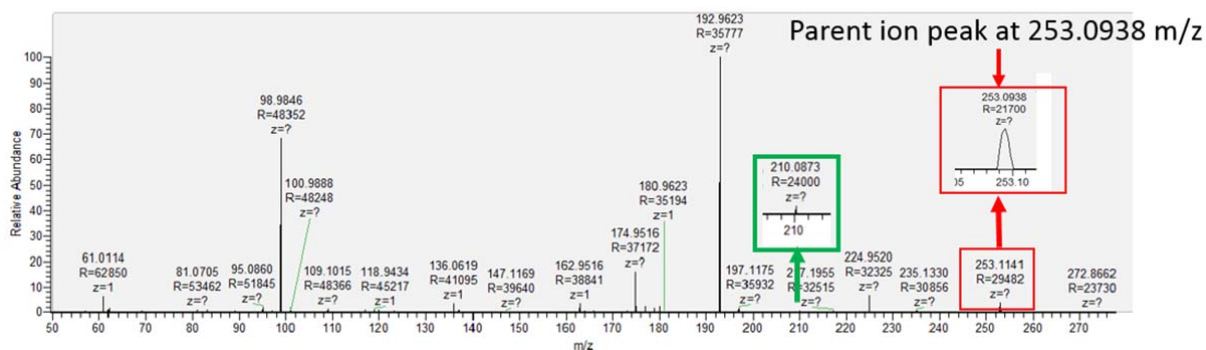

615

616 **Supplementary Figure 38: SION-19@UV-Thy(40%), Trial 3:** UHPLC-EIS/MS parallel reaction monitoring  
 617 (PRM) between 2.3-3.5 min. searching for a mass of 253.08-253.10 afforded multiple peaks at different  
 618 elution times. At an elution time of 2.58/2.57 min. a low broad peak for 210.08-210.09 m/z can be seen,  
 619 which corresponds to a fragmentation pattern of 253.0938 (parent ion), 210.0873 and 98.9846 m/z. Which  
 620 are all in good agreement with the reference Thy<>Thy pattern with 253.0934 (parent ion), 210.0876 and  
 621 98.9847 m/z.

622

623

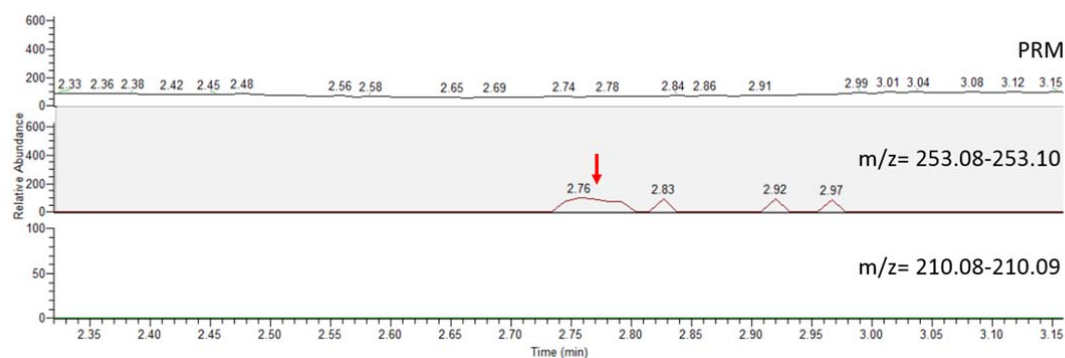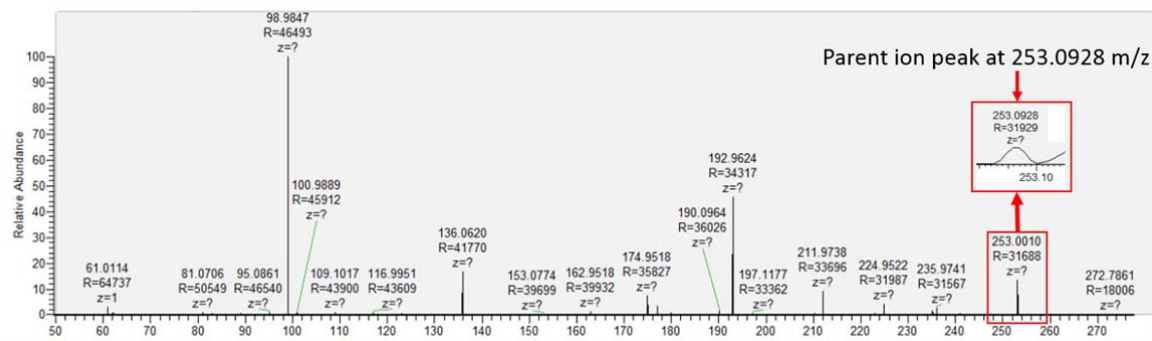

624

625 **Supplementary Figure 39: SION-19@UV-Thy(45%), trial 1.** UHPLC-EIS/MS parallel reaction monitoring  
 626 (PRM) between 2.3-3.5 min. In the fragmentation pattern 253.0928 (parent ion), and 98.9847 m/z are in  
 627 good agreement with the reference Thy<>Thy pattern with 253.0934 (parent ion), and 98.9847 m/z. Due to  
 628 the low concentration of Thy<>Thy formation, a peak at 210.08 was not visible. It should be noted that the  
 629 elution time of the Thy<>Thy molecules is shifted due to increased sample loading (40  $\mu$ L of a sample  
 630 containing 350  $\mu$ L DMSO/Thy<>Thy in 1 mL of H<sub>2</sub>O).

631

632

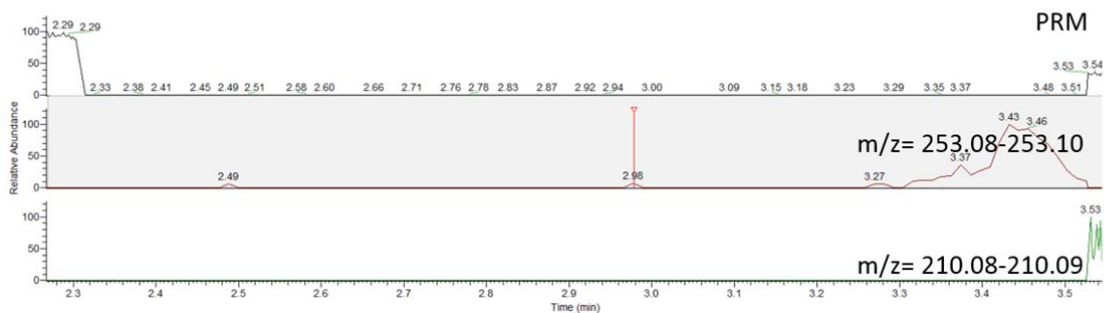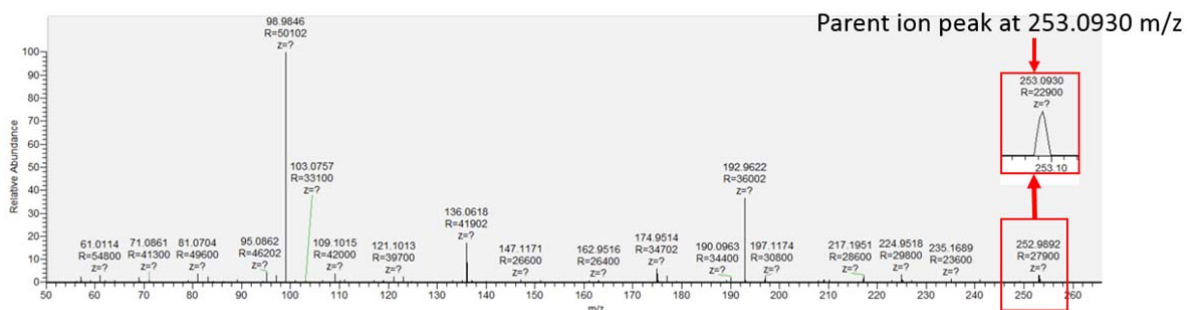

633

634 **Supplementary Figure 40: SION-19@UV-Thy(45%), trial 2.** UHPLC-EIS/MS parallel reaction monitoring  
 635 (PRM) between 2.3-3.5 min. In the fragmentation pattern 253.0930 (parent ion), and 98.9846 m/z are in  
 636 good agreement with the reference Thy<>Thy pattern with 253.0934 (parent ion), and 98.9847 m/z. It  
 637 should be noted that the elution time of the Thy<>Thy molecules is shifted due to increased sample loading  
 638 (50  $\mu$ L of a sample containing 350  $\mu$ L DMSO/Thy<>Thy in 1 mL of H<sub>2</sub>O).

639

640



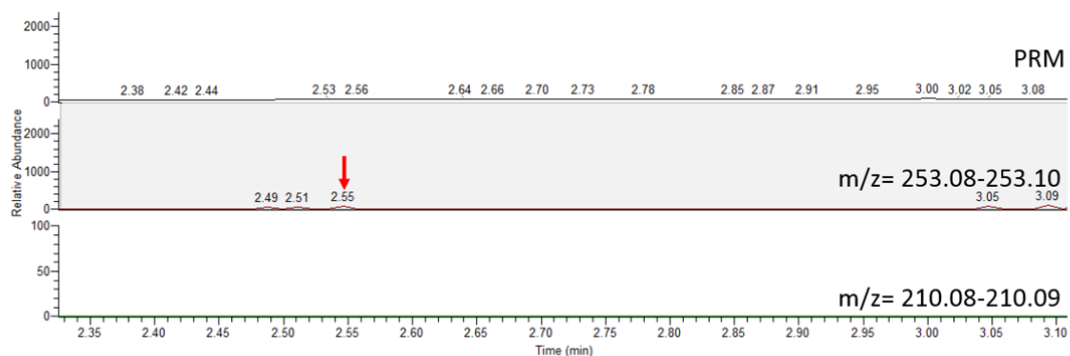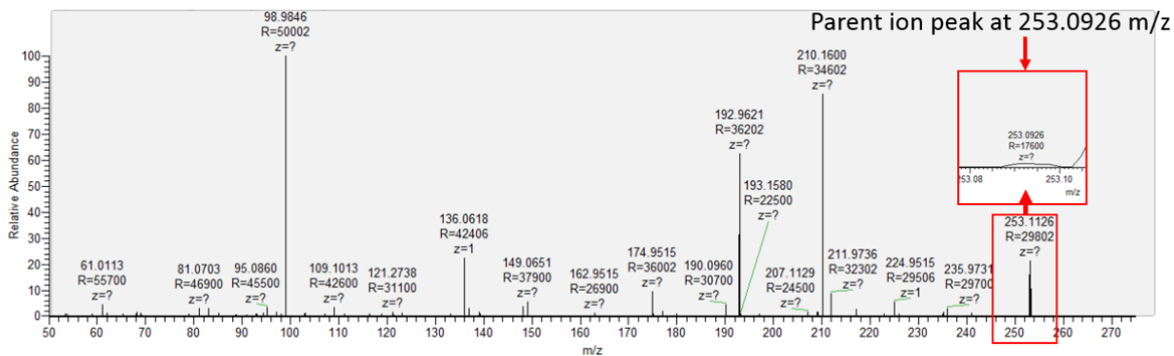

641

642 **Supplementary Figure 41: SION-19@UV-Thy(45%), trial 3.** UHPLC-EIS/MS parallel reaction monitoring  
 643 (PRM) between 2.3-3.5 min. In the fragmentation pattern 253.0926 (parent ion), and 98.9846 m/z are all in  
 644 good agreement with the reference Thy<>Thy pattern with 253.0934 (parent ion), and 98.9847 m/z.

645

646

647

648

649

650

651

652

653

654

655

656

657

658 **Supplementary Discussion 8.4.1. Analysis for Unreacted Thy and Fragmentation Pattern for SION-**  
659 **19@UV-Thy(40%).**

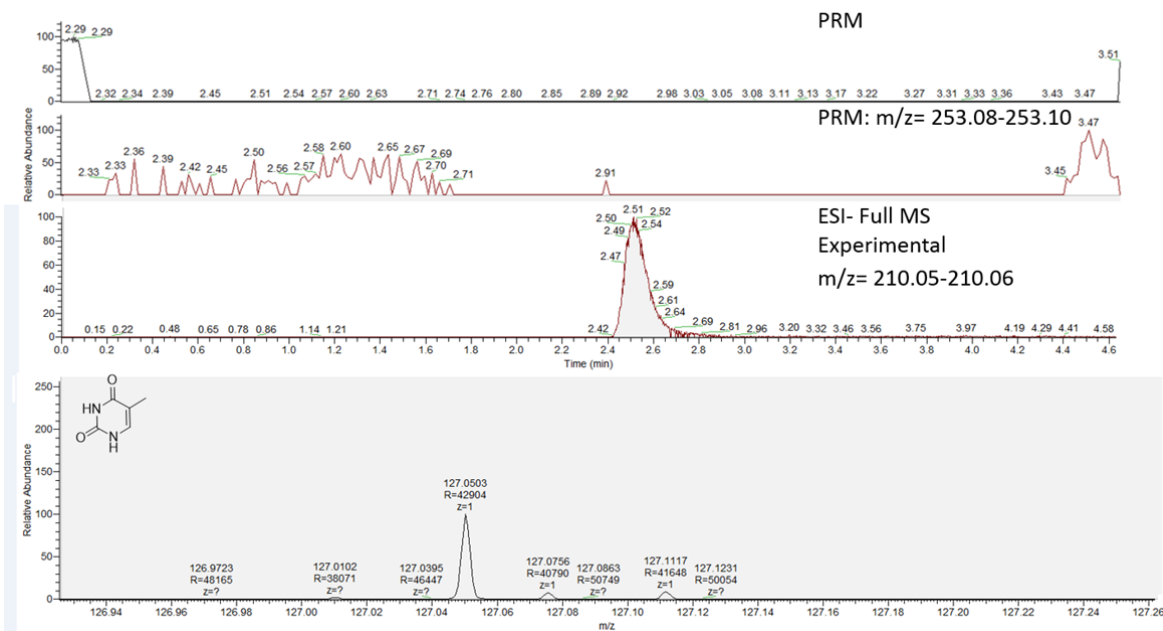

660

661 **Supplementary Figure 42: SION-19@UV-Thy(40%) UHPLC-EIS/MS: Full MS and PRM between 2.3-3.5 min.**  
662 Further analysis of **SION-19@UV-Thy(40%)** for unreacted Thy yields a parent ion peak of 127.0503 m/z  
663 which is in agreement with the observed Thy parent ion peak of 127.0505 m/z and theoretical parent ion  
664 peak of 127.0502 m/z.

665

666

667

668

669

670

671

672

673

674

675

676

677 **Supplementary Table 9:** Summary of UHPLC-EI/MS for **SION-19@UV-Thy(20-80%)**, Thy, and Thy<>Thy. It  
 678 should be noted for Trials 1 and 2 of **SION-19@UV-Thy(45%)** higher concentrations of sample were  
 679 required to see the parent ion.

|                      | Elution time (min)                              | Theoretical parent ion (m/z) | Experimental parent ion (m/z)                               | Common fragments (i.e. base peak, etc.) (m/z)                                                                                       |
|----------------------|-------------------------------------------------|------------------------------|-------------------------------------------------------------|-------------------------------------------------------------------------------------------------------------------------------------|
| Thy                  | 2.61                                            | 127.0502                     | 127.0505                                                    | -----                                                                                                                               |
| Thy<>Thy             | 2.59                                            | 253.0931                     | 253.0932                                                    | 210.0876,<br>98.9847                                                                                                                |
| SION-19@UV-Thy (20%) | -----                                           | -----                        | -----                                                       | -----                                                                                                                               |
| SION-19@UV-Thy (30%) | -----                                           | -----                        | -----                                                       | -----                                                                                                                               |
| SION-19@UV-Thy (40%) | 2.58                                            | -----                        | Trial 1: 253.0933<br>Trial 2: 253.0930<br>Trial 3: 253.0938 | Trial 1: 210.0873<br>98.9846<br>Trial 2: 210.0875<br>98.9846<br>Trial 3: 210.0873<br>98.9846<br><br>Unreacted Thy<br>(127.0503 m/z) |
| SION-19@UV-Thy (45%) | Trial 1: 2.76<br>Trial 2: 2.98<br>Trial 3: 2.55 |                              | Trial 1: 253.0928<br>Trial 2: 253.0930<br>Trial 3: 253.0926 | Trial 1: 98.9847<br>Trial 2: 98.9846<br>Trial 3: 98.9846<br><br>Unreacted Thy<br>(127.0503 m/z)                                     |
| SION-19@UV-Thy (50%) | -----                                           | -----                        | -----                                                       | -----                                                                                                                               |
| SION-19@UV-Thy (60%) | -----                                           | -----                        | -----                                                       | -----                                                                                                                               |
| SION-19@UV-Thy (80%) | -----                                           | -----                        | -----                                                       | -----                                                                                                                               |

680

681

682

683

684

685

686 **Supplementary Discussion 8.4.2. Isolation of Thy<>Thy from SION-19@UV-Thy(40%).**

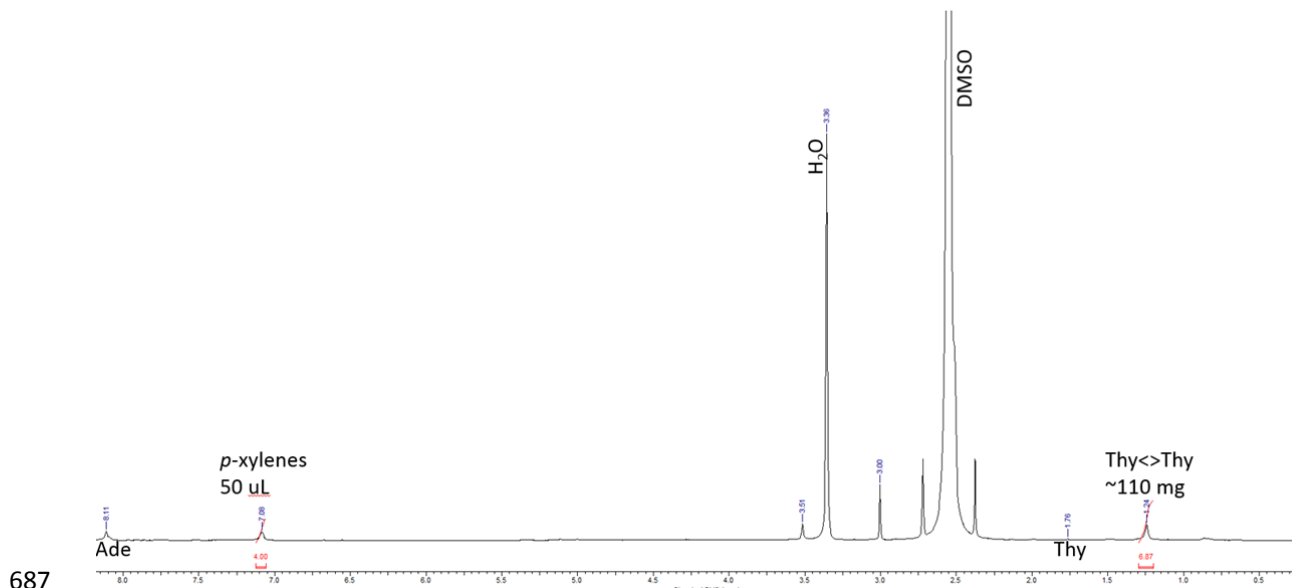

708 **Supplementary Discussion 9. Bio-MOF-1, HKUST-1 and Zn-MOF-74: Thy to Thy<>Thy Dimerization within**  
709 **the Pores.**

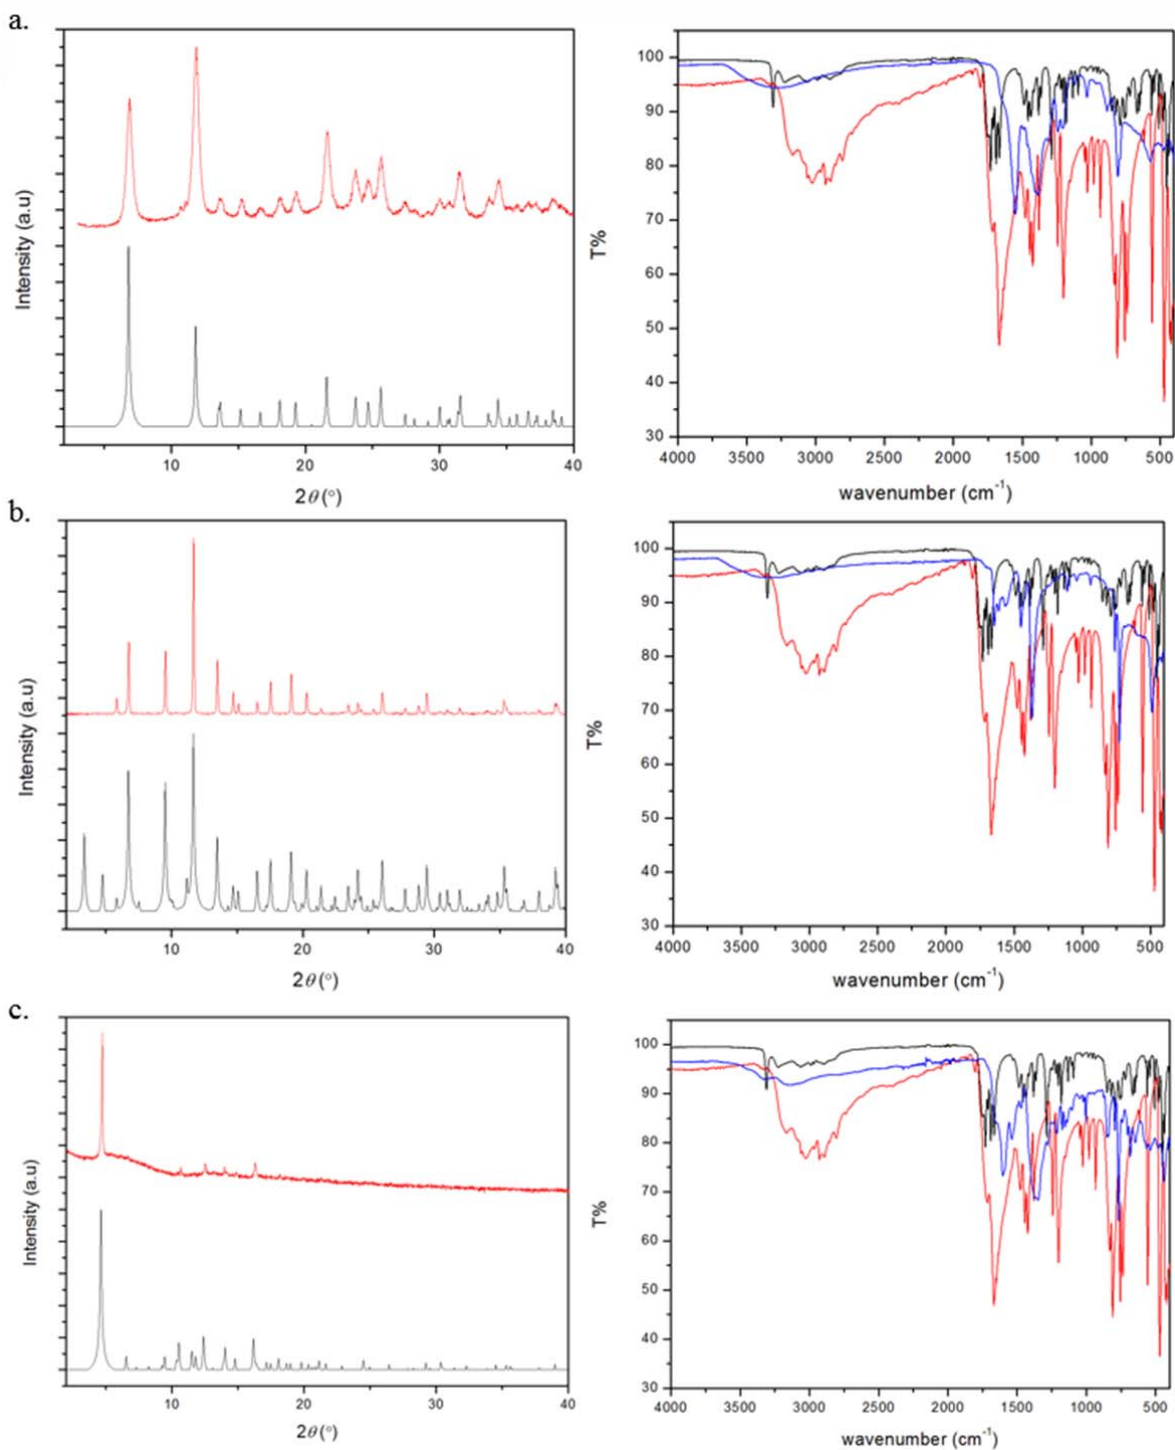

710

711 **Supplementary Figure 44:** a) left: **Zn-MOF-74** PXRD. Color scheme: black, theory; red, **Zn-MOF-74**. Right: IR  
712 of Zn-MOF-74. Color scheme: red, Thy; black, Thy<>Thy; blue, **Zn-MOF-74**. b) left: **HKUST-1** PXRD. Color  
713 scheme: black, theory; red, **HKUST-1**. Right: IR of Zn-MOF-74. Color scheme: red, Thy; black, Thy<>Thy;  
714 blue, **HKUST-1**. c) left: **Bio-MOF-1** PXRD. Color scheme: black, theory; red, **Bio-MOF-1**. Right: IR of Zn-MOF-  
715 74. Color scheme: red, Thy; black, Thy<>Thy; blue, **Bio-MOF-1**.

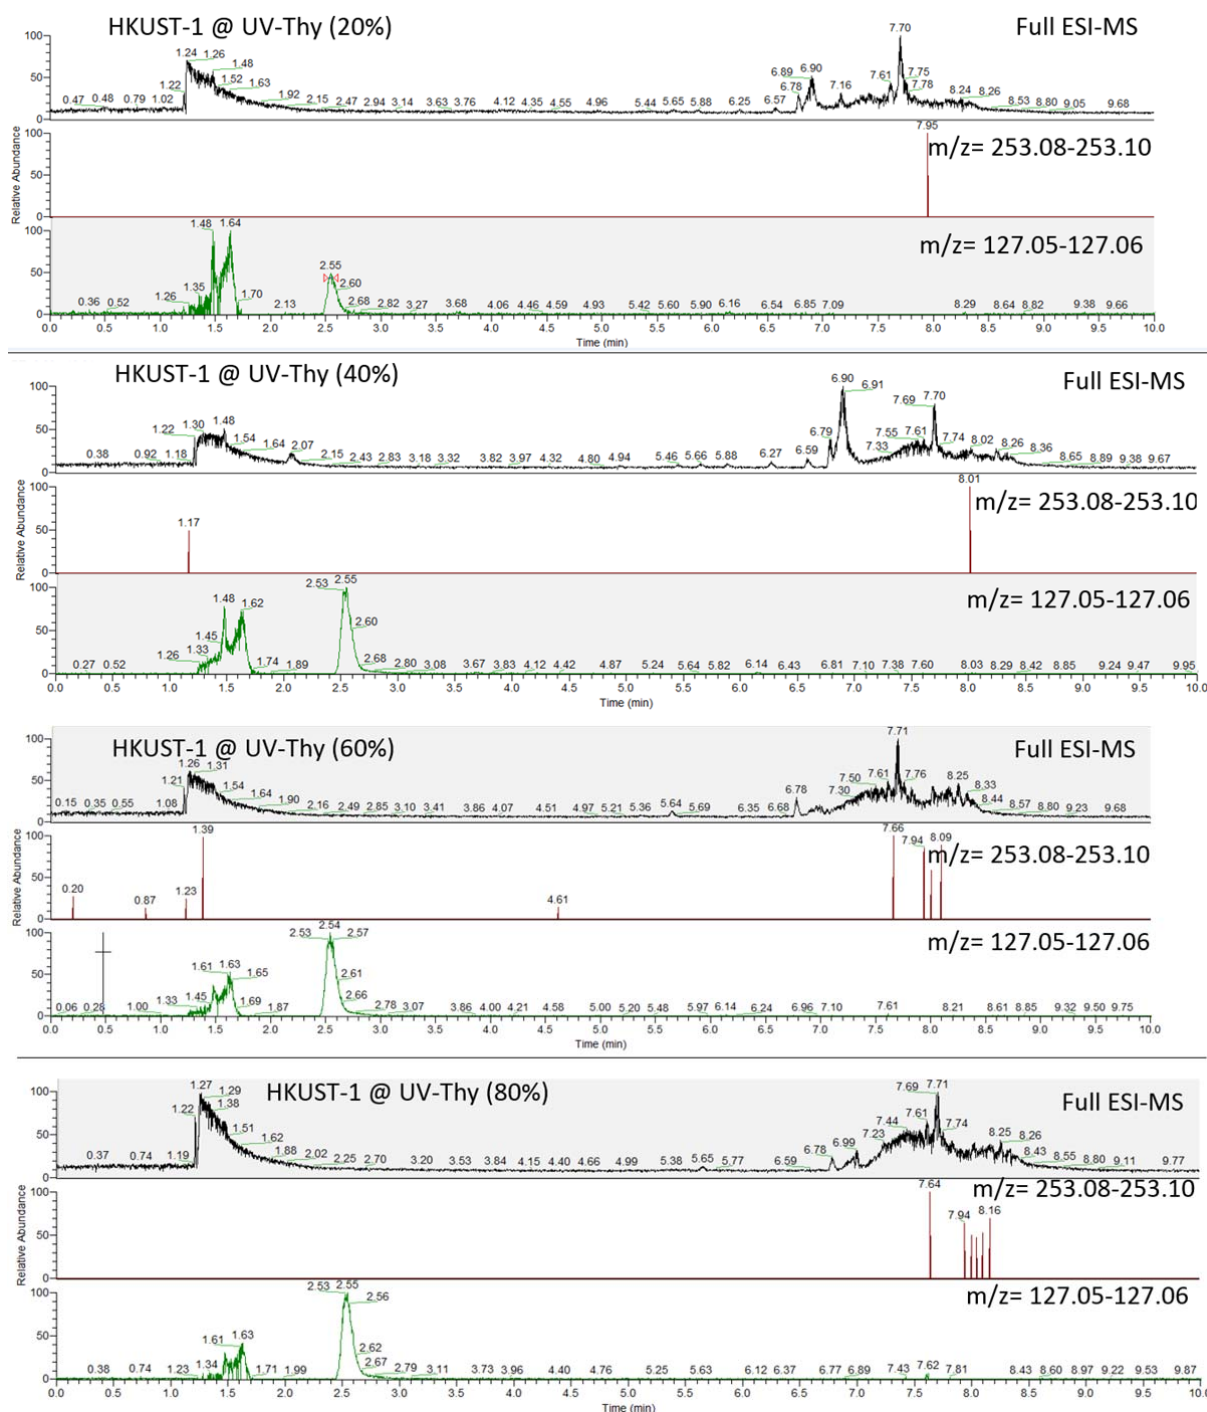

716

717

718 **Supplementary Figure 45: HKUST-1@UV-Thy (20-80%) HPLC-EIS/MS.** In all experiments, no peak at 2.59  
 719 min is found for a mass between 253.08-253.10 corresponding to Thy<>Thy. Instead, only a peak at 2.54-  
 720 2.55 min is found with m/z = 127.05-127.06 is found, which corresponds to Thy. From this analysis, it can be  
 721 concluded that Thy does not dimerize within the pores of HKUST-1.

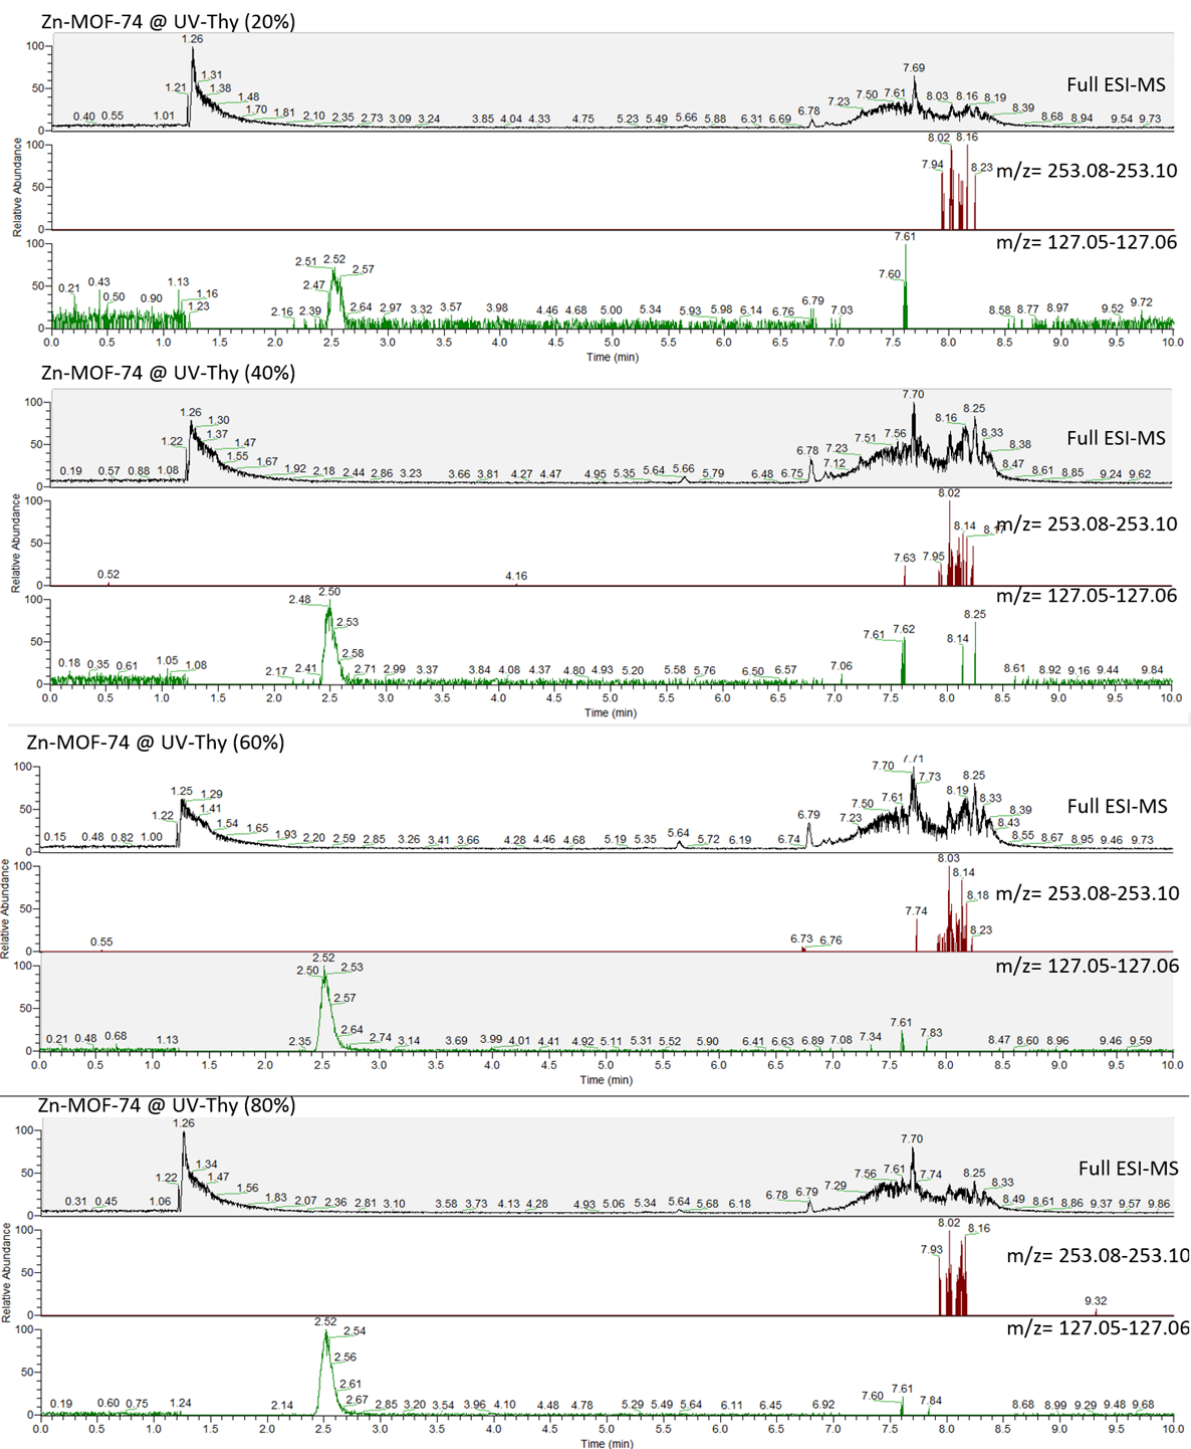

722

723

724 **Supplementary Figure 46: Zn-MOF-74@UV-Thy(20-80%) HPLC-EIS/MS.** In all experiments, no peak at 2.59  
 725 min is found for a mass between 253.08-253.10 corresponding to Thy<>Thy. Instead, only a peak at 2.54-  
 726 2.55 min is found with  $m/z = 127.05-127.06$  is found, which corresponds to Thy. From this analysis, it can be  
 727 concluded that Thy does not dimerize within the pores of Zn-MOF-74.

728

729

730

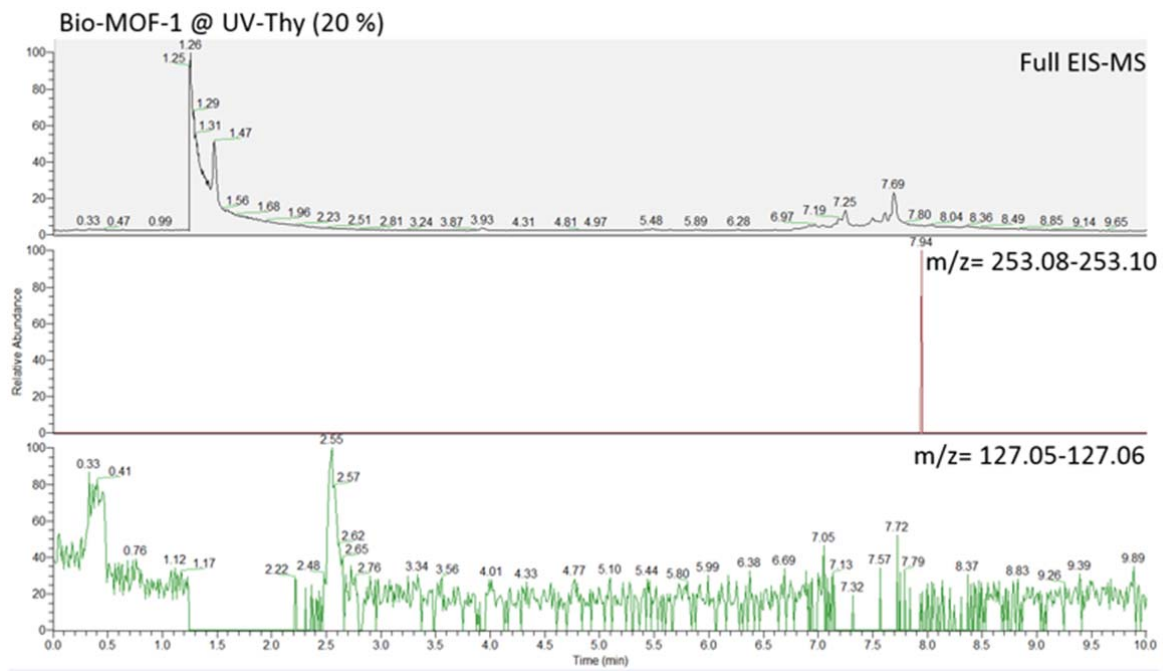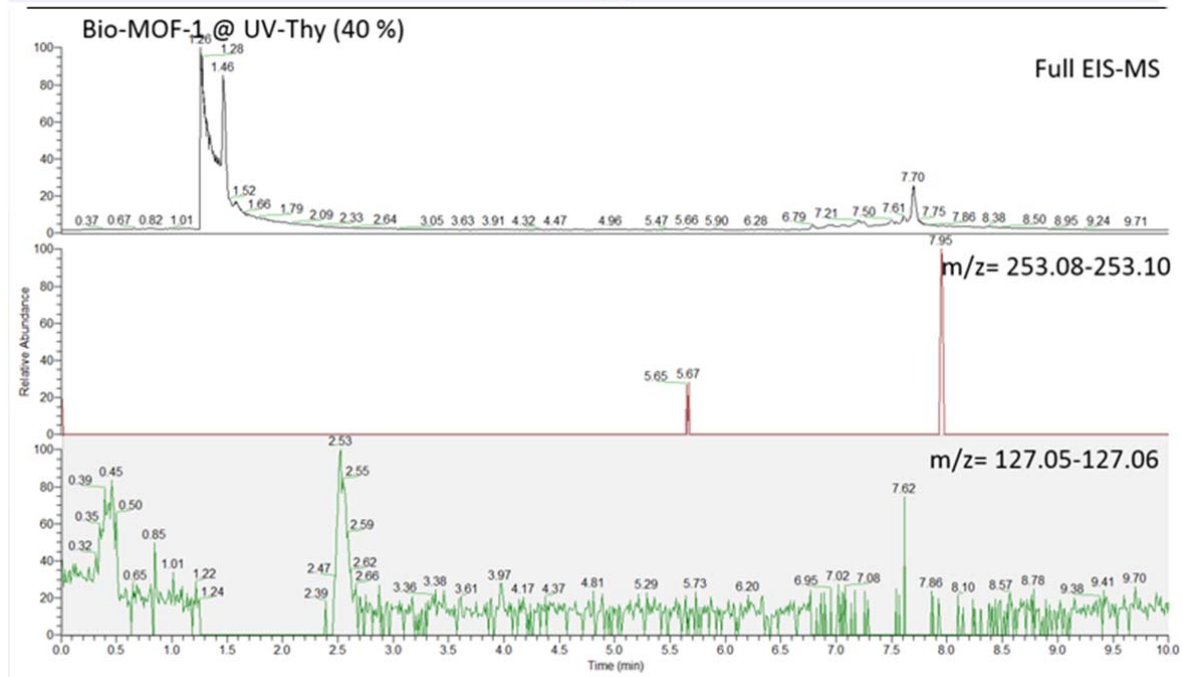

731

732



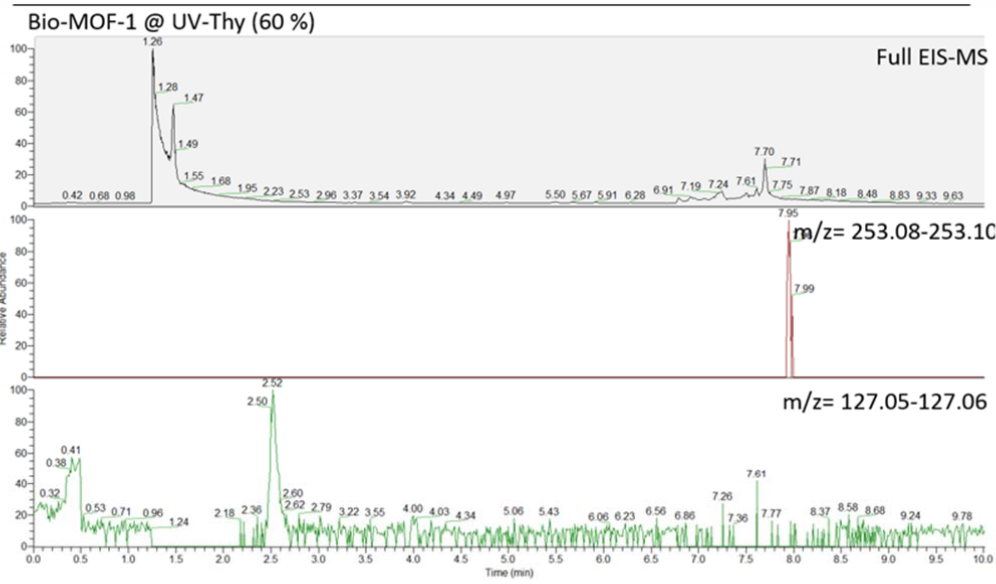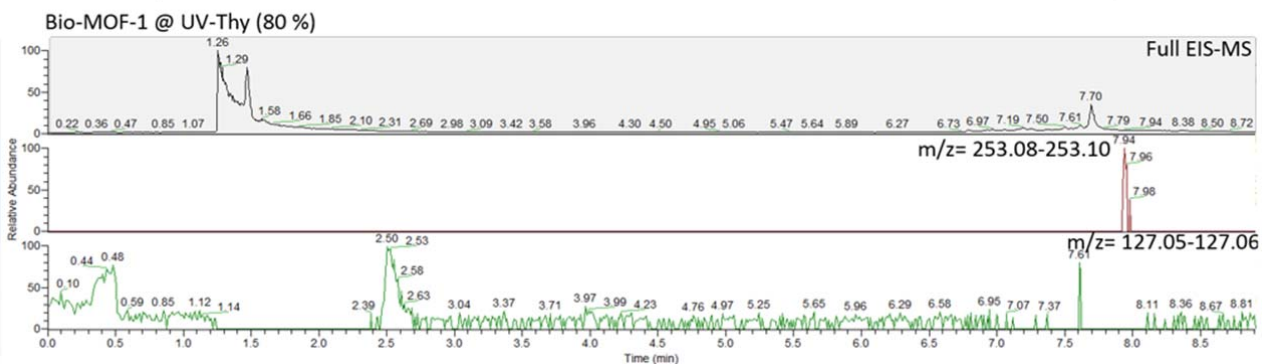

733

734 **Supplementary Figure 47: Bio-MOF-1@UV-Thy(20-80%) HPLC-EIS/MS.** In all experiments, no peak at 2.59  
 735 min is found for a mass between 253.08-253.10 corresponding to Thy<>Thy. Instead, only a peak at 2.54-  
 736 2.55 min is found with  $m/z = 127.05-127.06$  is found, which corresponds to Thy. From this analysis, it can be  
 737 concluded that Thy does not dimerize within the pores of **Bio-MOF-1**.

738

739

740

741

742

743

744

745

746

747

748

749 **10. Supplementary References.**

- 750 1. Rigaku, O. (Oxford Diffraction Ltd, Yarnton, 2015).
- 751 2. Sheldrick, G. Crystal structure refinement with SHELXL. *Acta Crystallographica Section C* **71**, 3-8  
752 (2015).
- 753 3. Palatinus, L. & Chapuis, G. SUPERFLIP—a computer program for the solution of crystal structures by  
754 charge flipping in arbitrary dimensions. *J. Appl. Crystallogr.* **40**, 786-790 (2007).
- 755 4. Palatinus, L. & van der Lee, A. Symmetry determination following structure solution in P1. *J. Appl.*  
756 *Crystallogr.* **41**, 975-984 (2008).
- 757 5. Palatinus, L., Prathapa, S.J. & Smaalen, S.v. EDMA: a computer program for topological analysis of  
758 discrete electron densities. *J. Appl. Crystallogr.* **45**, 575-580 (2012).
- 759 6. Dolomanov, O.V., Bourhis, L.J., Gildea, R.J., Howard, J.A.K. & Puschmann, H. OLEX2: a complete  
760 structure solution, refinement and analysis program. *J. Appl. Crystallogr.* **42**, 339-341 (2009).
- 761 7. Van der Sluis, P. & Spek, A. BYPASS: an effective method for the refinement of crystal structures  
762 containing disordered solvent regions. *Acta. Cryst.* **46**, 194-201 (1990).
- 763 8. Blatov, V.A., Shevchenko, A.P. & Proserpio, D.M. Applied Topological Analysis of Crystal Structures  
764 with the Program Package ToposPro. *Cryst. Growth Des.* **14**, 3576-3586 (2014).
- 765 9. Feyer, V. et al. Bonding at the organic/metal interface: Adenine to Cu(110). *Phys. Rev. B.* **79**,  
766 155432 (2009).
- 767 10. Kresse, G. & Furthmüller, J. Efficient iterative schemes for ab initio total-energy calculations using a  
768 plane-wave basis set. *Phys. Rev. B.* **54**, 11169-11186 (1996).
- 769 11. Kresse, G. & Furthmüller, J. Efficiency of ab-initio total energy calculations for metals and  
770 semiconductors using a plane-wave basis set. *Comput. Mater. Sci.* **6**, 15-50 (1996).
- 771 12. Kresse, G. & Hafner, J. Ab initio. *Phys. Rev. B.* **49**, 14251-14269 (1994).
- 772 13. Kresse, G. & Hafner, J. Ab initio. *Phys. Rev. B.* **47**, 558-561 (1993).
- 773 14. Perdew, J.P., Burke, K. & Ernzerhof, M. Generalized Gradient Approximation Made Simple [Phys.  
774 Rev. Lett. **77**, 3865 (1996)]. *Phys. Rev. Lett.* **78**, 1396-1396 (1997).
- 775 15. Perdew, J.P., Burke, K. & Ernzerhof, M. Generalized Gradient Approximation Made Simple. *Phys.*  
776 *Rev. Lett.* **77**, 3865-3868 (1996).
- 777 16. Blöchl, P.E. Projector augmented-wave method. *Phys. Rev. B.* **50**, 17953-17979 (1994).
- 778 17. Ongari, D. et al. Accurate Characterization of the Pore Volume in Microporous Crystalline Materials.  
779 *Langmuir* **33**, 14529-14538 (2017).
- 780 18. Campaña, C., Mussard, B. & Woo, T.K. Electrostatic Potential Derived Atomic Charges for Periodic  
781 Systems Using a Modified Error Functional. *J. Chem. Theory Comput.* **5**, 2866-2878 (2009).
- 782 19. Plimpton, S. Fast Parallel Algorithms for Short-Range Molecular Dynamics. *J. Comput. Phys.* **117**, 1-  
783 19 (1995).

- 784 20. Mayo, S.L., Olafson, B.D. & Goddard, W.A. DREIDING: a generic force field for molecular  
785 simulations. *J. Phys. Chem.* **94**, 8897-8909 (1990).
- 786 21. Liu, Y., Bryantsev, V.S., Diallo, M.S. & Goddard I, W.A. PAMAM Dendrimers Undergo pH Responsive  
787 Conformational Changes without Swelling. *J. Am. Chem. Soc.* **131**, 2798-2799 (2009).
- 788 22. Willems, T.F., Rycroft, C.H., Kazi, M., Meza, J.C. & Haranczyk, M. Algorithms and tools for high-  
789 throughput geometry-based analysis of crystalline porous materials. *Micropor. Mesopor. Mat.* **149**,  
790 134-141 (2012).
- 791 23. Pinheiro, M. et al. Characterization and comparison of pore landscapes in crystalline porous  
792 materials. *J. Mol. Graph. Model.* **44**, 208-219 (2013).
- 793 24. Pinheiro, M., Martin, R.L., Rycroft, C.H. & Haranczyk, M. High accuracy geometric analysis of  
794 crystalline porous materials. *CrystEngComm* **15**, 7531-7538 (2013).
- 795 25. Michaud-Agrawal, N., Denning, E.J., Woolf, T.B. & Beckstein, O. MDAAnalysis: A toolkit for the  
796 analysis of molecular dynamics simulations. *J. Comput. Chem.* **32**, 2319-2327 (2011).
- 797 26. J Gowers, R. et al. MDAAnalysis: a Python package for the rapid analysis of molecular dynamics  
798 simulations. (2016).
- 799 27. Füchtbauer, W. & Mazur, P. Kinetics of the ultraviolet-induced dimerization of thymine in frozen  
800 solutions\*. *J. Photochem. Photobiol.* **5**, 323-335 (1966).
- 801 28. Beukers, R. & Berends, W. The effects of u.v.-irradiation on nucleic acids and their components.  
802 *Biochim. Biophys. Acta* **49**, 181-189 (1961).
- 803 29. Cadet, J. et al. Characterization of thymidine ultraviolet photoproducts. Cyclobutane dimers and  
804 5,6-dihydrothymidines. *Can. J. Chem.* **63**, 2861-2868 (1985).
- 805 30. Burdi, D., Hoyt, S. & Begley, T.P. Design of a cleavable linker for the synthesis of a cis-syn pyrimidine  
806 photodimer. *Tetrahedron Lett.* **33**, 2133-2136 (1992).

807
